# Supplementary material for: Synthesis of an enantiopure scorpionate ligand by a nucleophilic addition to a ketenimine and a zinc initiator for the isoselective ROP of rac-lactide
Source: Royal Society of Chemistry journal article supplement (doi:10.1039/c9cc04716f), 2019-01-01
Supplement: c9cc04716f1.pdf [file c9cc04716f1.pdf]

## ELECTRONIC SUPPORTING INFORMATION

# Synthesis of an Enantiopure Scorpionate Ligand by a Nucleophilic Addition to a Ketenimine and a Zinc Initiator for the Ioselective ROP of *rac*-Lactide.

*Manuel Honrado,<sup>a</sup> Sonia Sobrino,<sup>a</sup> Juan Fernández-Baeza, \*,<sup>a</sup> Luis F. Sánchez-Barba, \*,<sup>b</sup> Andrés  
Garcés,<sup>b</sup> Agustín Lara-Sánchez<sup>a</sup> and Ana M. Rodríguez.<sup>a</sup>*

*<sup>a</sup>Universidad de Castilla-La Mancha, Departamento de Química Inorgánica, Orgánica y Bioquímica-  
Centro de Innovación en Química Avanzada (ORFEO-CINQA), Campus Universitario, 13071-Ciudad  
Real, Spain.*

*<sup>b</sup>Universidad Rey Juan Carlos, Departamento de Biología y Geología, Física y Química Inorgánica,  
Móstoles-28933-Madrid, Spain.*

## Table of Contents

### 1) Spectroscopy details:

|                                                                                                                                                                           |     |
|---------------------------------------------------------------------------------------------------------------------------------------------------------------------------|-----|
| <b>Figure S1.</b> $^1\text{H}$ and $^{13}\text{C}$ - $^1\text{H}$ NMR spectra of compound <b>1</b> .....                                                                  | S4  |
| <b>Figure S2.</b> $^1\text{H}$ $^{13}\text{C}$ - $\{^1\text{H}\}$ NMR spectra of compound <b>2</b> .....                                                                  | S5  |
| <b>Figure S3.</b> $^1\text{H}$ $^{13}\text{C}$ - $\{^1\text{H}\}$ NMR spectra of compound <b>3</b> , $^1\text{H}$ NMR spectrum of compounds <b>3a</b> and <b>3b</b> ..... | S6  |
| <b>Figure S4.</b> $^1\text{H}$ and $^{13}\text{C}$ - $\{^1\text{H}\}$ NMR spectra of compound <b>4</b> .....                                                              | S8  |
| <b>Figure S5.</b> Mass spectra of compound <b>4</b> .....                                                                                                                 | S9  |
| <b>Figure S6.</b> $^1\text{H}$ and $^{13}\text{C}$ - $\{^1\text{H}\}$ NMR spectra of compound <b>5</b> .....                                                              | S10 |
| <b>Figure S7.</b> Mass spectra of compound <b>5</b> .....                                                                                                                 | S11 |

### 2) Ring-opening polymerization of *rac*-lactide details:

|                                                                                                                                                                  |     |
|------------------------------------------------------------------------------------------------------------------------------------------------------------------|-----|
| <b>Table S1.</b> Polymerization of <i>rac</i> -lactide catalyzed by complexes <b>4</b> and <b>5</b> .....                                                        | S13 |
| <b>Figure S8.</b> GPC traces corresponding to a poly( <i>rac</i> -lactide) sample.....                                                                           | S14 |
| <b>Figure S9.</b> Selected area of MALDI-ToF mass spectrum of PLA synthesized by using <b>4</b> .....                                                            | S15 |
| <b>Figure S10.</b> Deconvoluted $^1\text{H}$ NMR spectra of the homodecoupled <i>CH</i> resonance of poly( <i>rac</i> -lactide) obtained by using <b>4</b> ..... | S16 |
| <b>Table S2:</b> Tetrads area distribution and $P_i$ value calculation.....                                                                                      | S17 |

### 3) X-ray Diffraction Studies for Complex **5**:

|                                                                                                                                                          |     |
|----------------------------------------------------------------------------------------------------------------------------------------------------------|-----|
| <b>Table S3.</b> Crystal data and structure refinement for <b>5</b> .....                                                                                | S18 |
| <b>Table S4.</b> Atomic coordinates ( $\times 10^4$ ) and equivalent isotropic displacement parameters ( $\text{\AA}^2 \times 10^3$ ) for <b>5</b> ..... | S19 |
| <b>Table S5.</b> Bond lengths ( $\text{\AA}$ ) and angles (degrees) for <b>5</b> .....                                                                   | S21 |
| <b>Table S6.</b> Anisotropic Displacement Parameters ( $\text{\AA}^2 \times 10^3$ ) for <b>5</b> .....                                                   | S27 |
| <b>Table S7.</b> Hydrogen coordinates ( $\times 10^4$ ) and isotropic displacement parameters ( $\text{\AA}^2 \times 10^3$ ) for <b>5</b> .....          | S29 |

4) EXPERIMENTAL SECTION:

|                                                                               |     |
|-------------------------------------------------------------------------------|-----|
| General Procedures.....                                                       | S32 |
| Instruments and Measurements.....                                             | S32 |
| Preparation of Compounds <b>1–5</b> .....                                     | S33 |
| Typical Polymerization Procedures.....                                        | S36 |
| X-Ray Crystallographic Structure Determination for the Complex <b>5</b> ..... | S36 |
| 5) References.....                                                            | S37 |

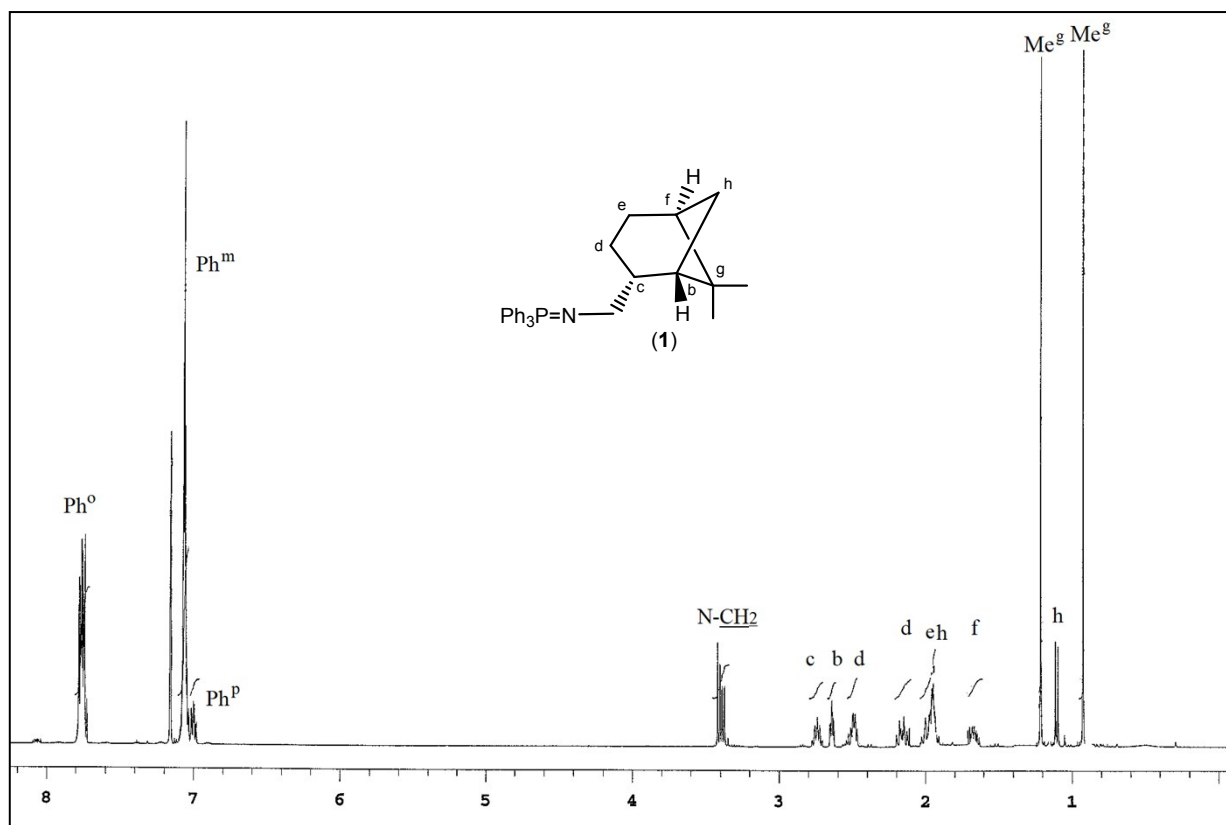

**Figure S1a.**  $^1\text{H}$  NMR (500 MHz, 298 K,  $\text{C}_6\text{D}_6$ ) spectrum of compound **1**.

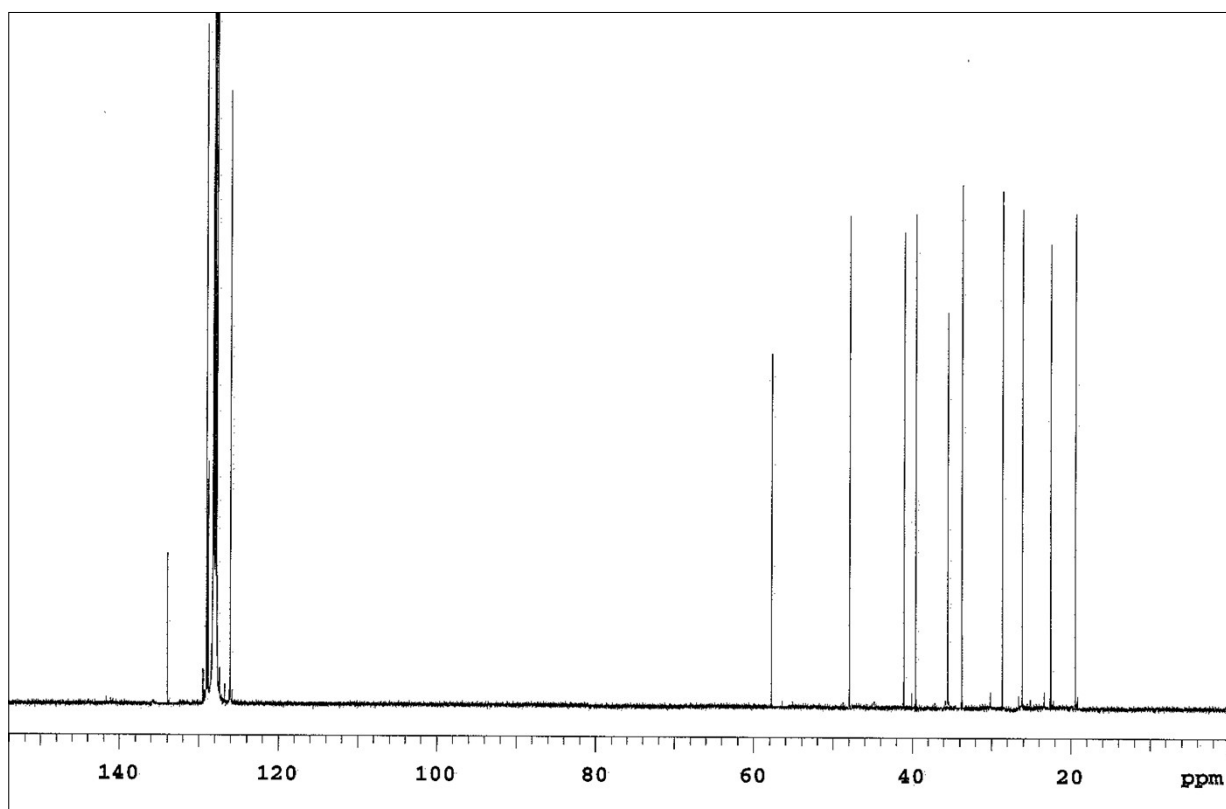

**Figure S1b.**  $^{13}\text{C}$ - $\{^1\text{H}\}$  NMR (125 MHz, 298 K,  $\text{C}_6\text{D}_6$ ) spectrum of compound **1**.

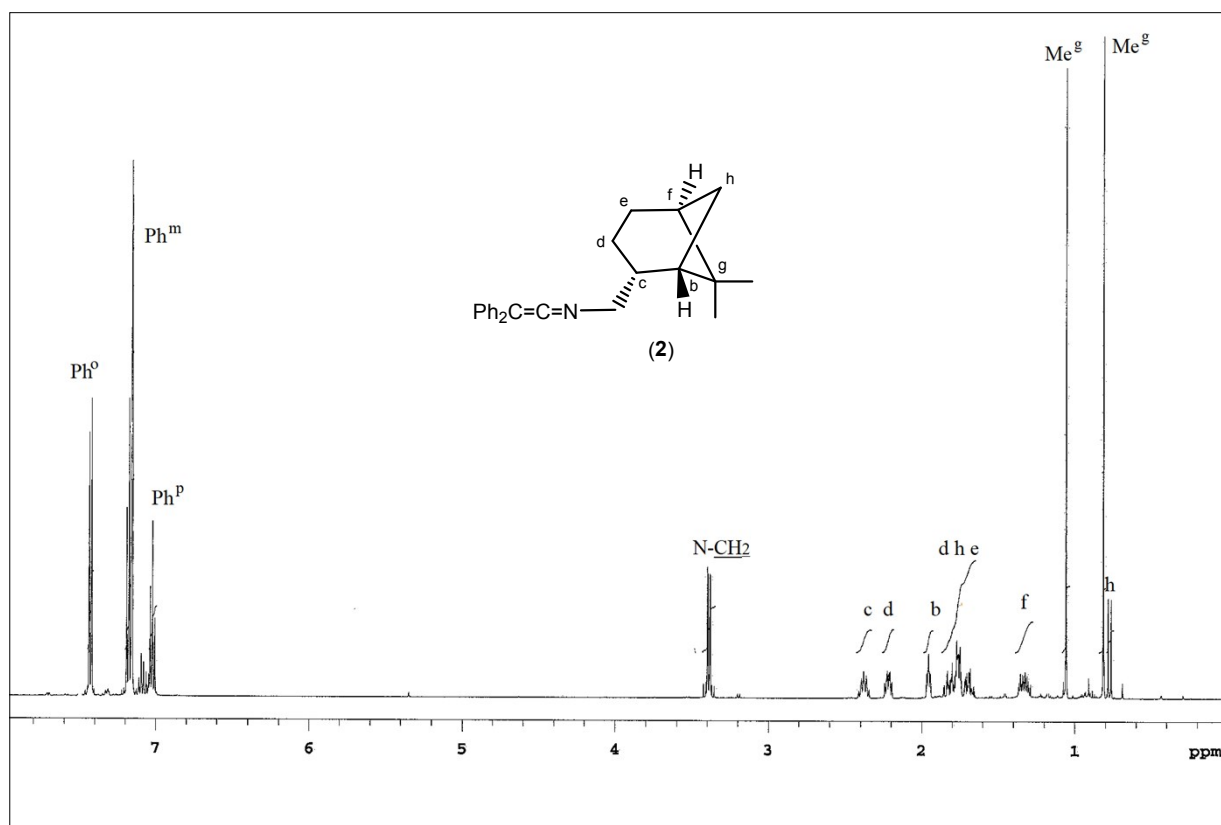

**Figure S2a.**  $^1\text{H}$  NMR (500 MHz, 298 K,  $\text{C}_6\text{D}_6$ ) spectrum of compound 2.

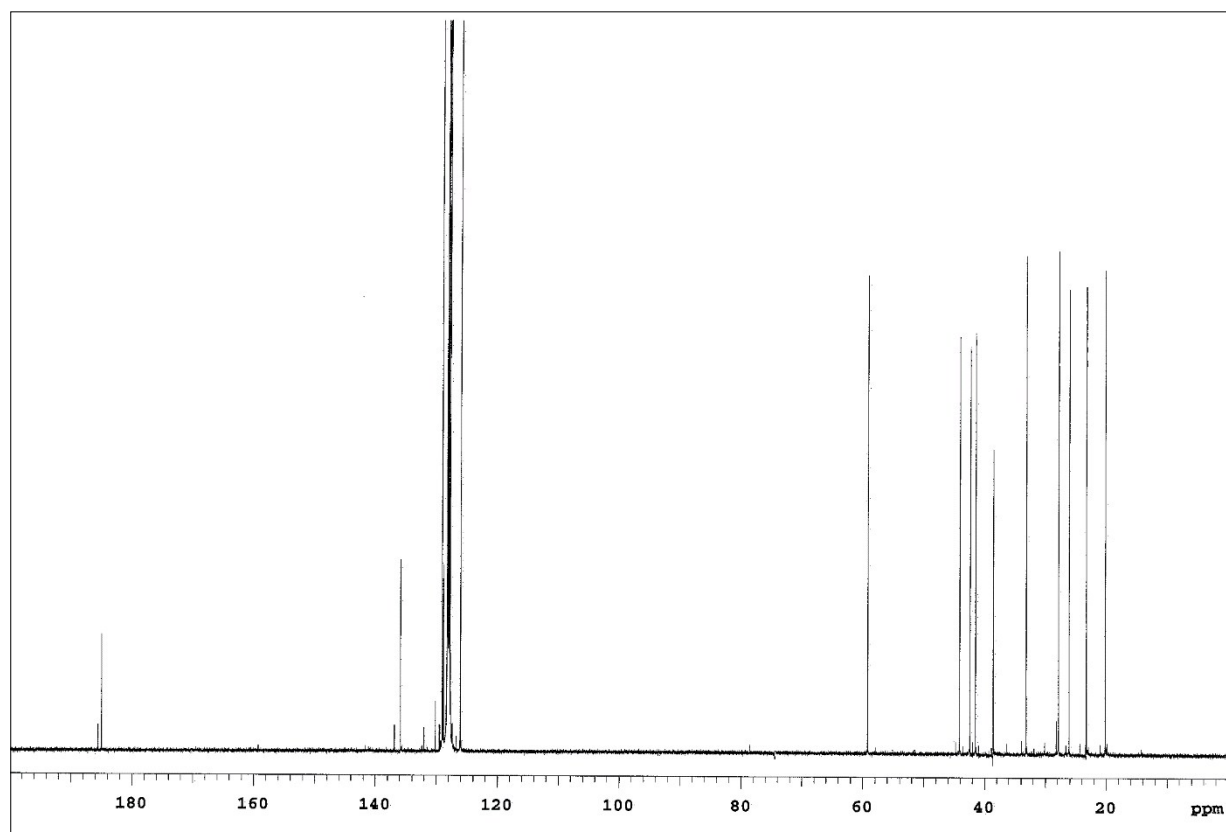

**Figure S2b.**  $^{13}\text{C}$ - $\{^1\text{H}\}$  NMR (125 MHz, 298 K,  $\text{C}_6\text{D}_6$ ) spectrum of compound 2.

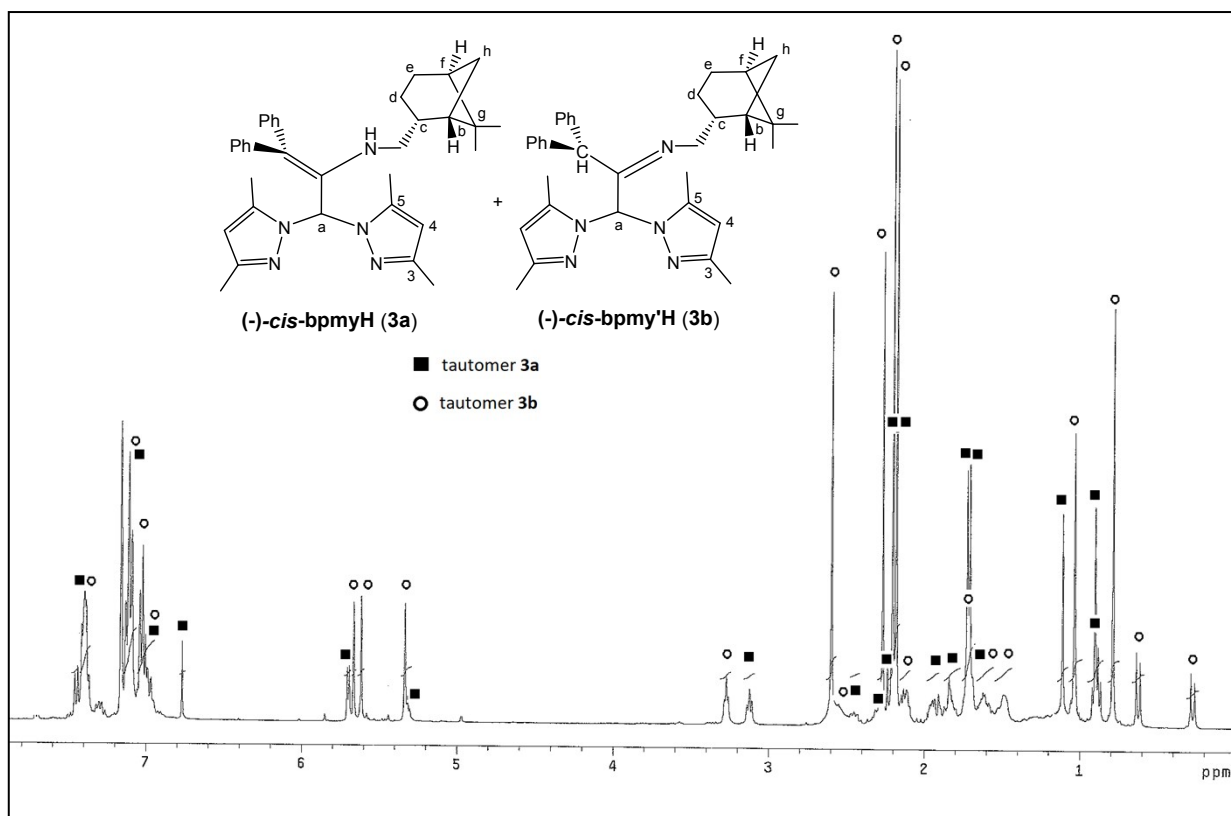

**Figure S3a.**  $^1\text{H}$  NMR (500 MHz, 298 K,  $\text{C}_6\text{D}_6$ ) spectrum of compound **3**.

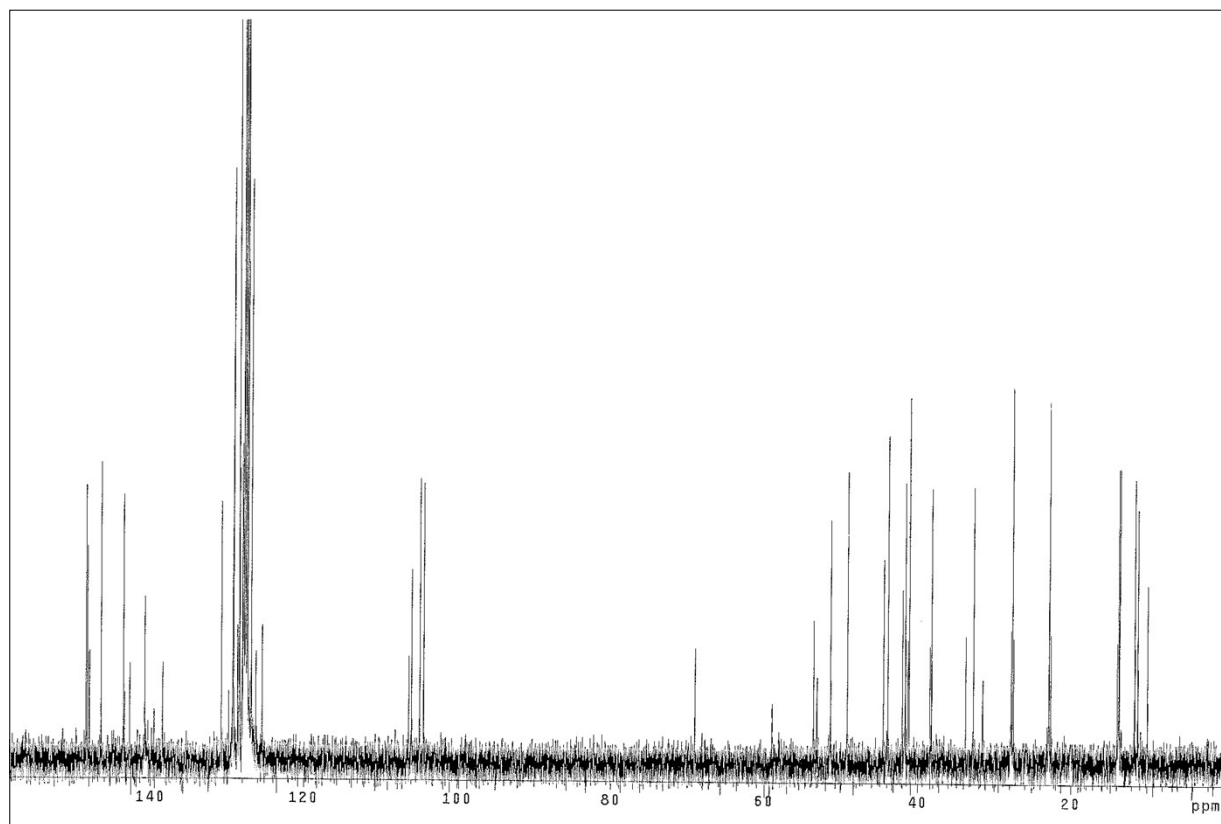

**Figure S3b.**  $^{13}\text{C}$ - $\{^1\text{H}\}$  NMR (125 MHz, 298 K,  $\text{C}_6\text{D}_6$ ) spectrum of compound **3**.



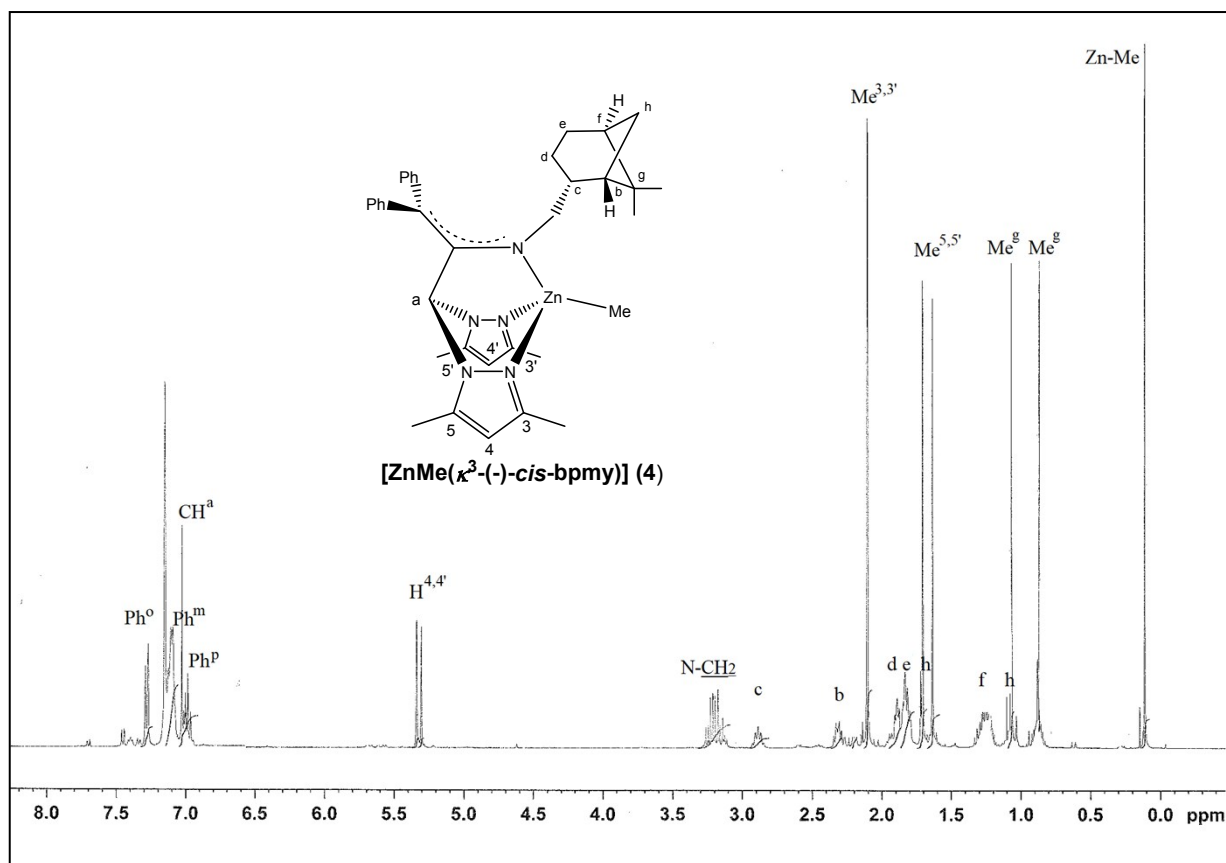

**Figure S4a.** <sup>1</sup>H NMR (500 MHz, 298 K, C<sub>6</sub>D<sub>6</sub>) spectrum of compound 4.

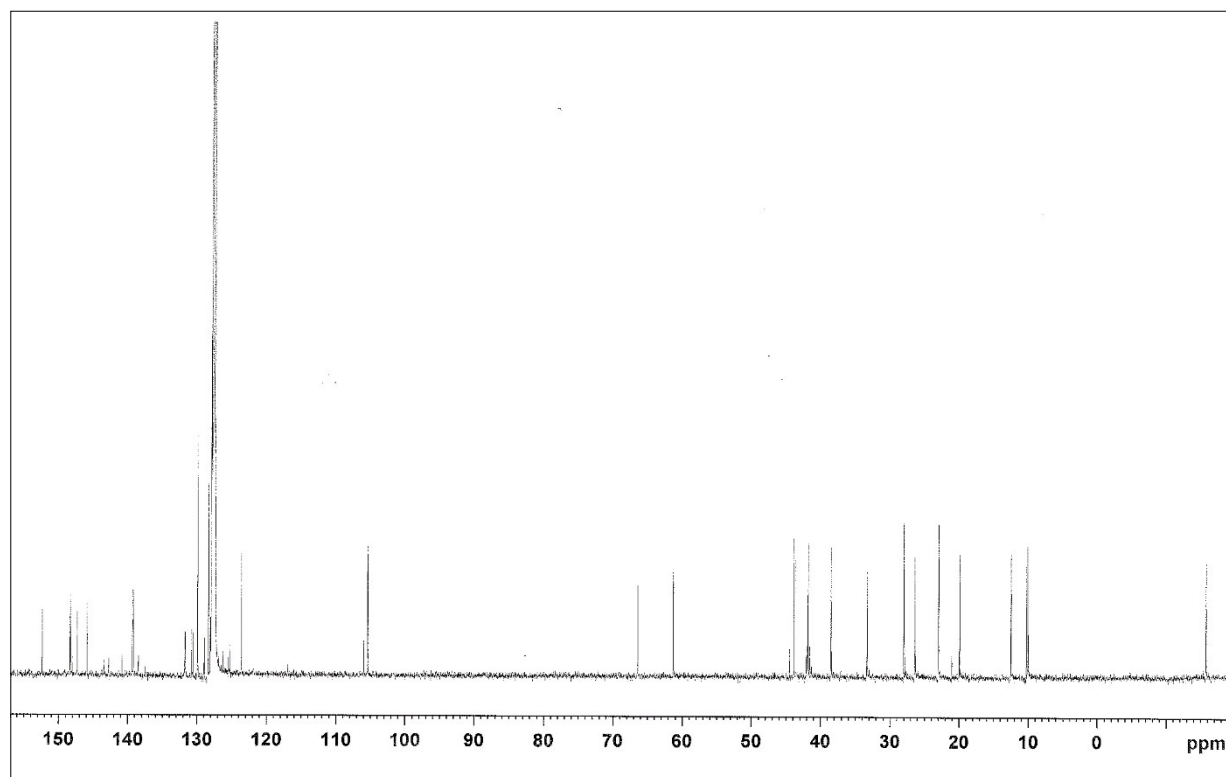

**Figure S4b.** <sup>13</sup>C-{<sup>1</sup>H} NMR (125 MHz, 298 K, C<sub>6</sub>D<sub>6</sub>) spectrum of compound 4.



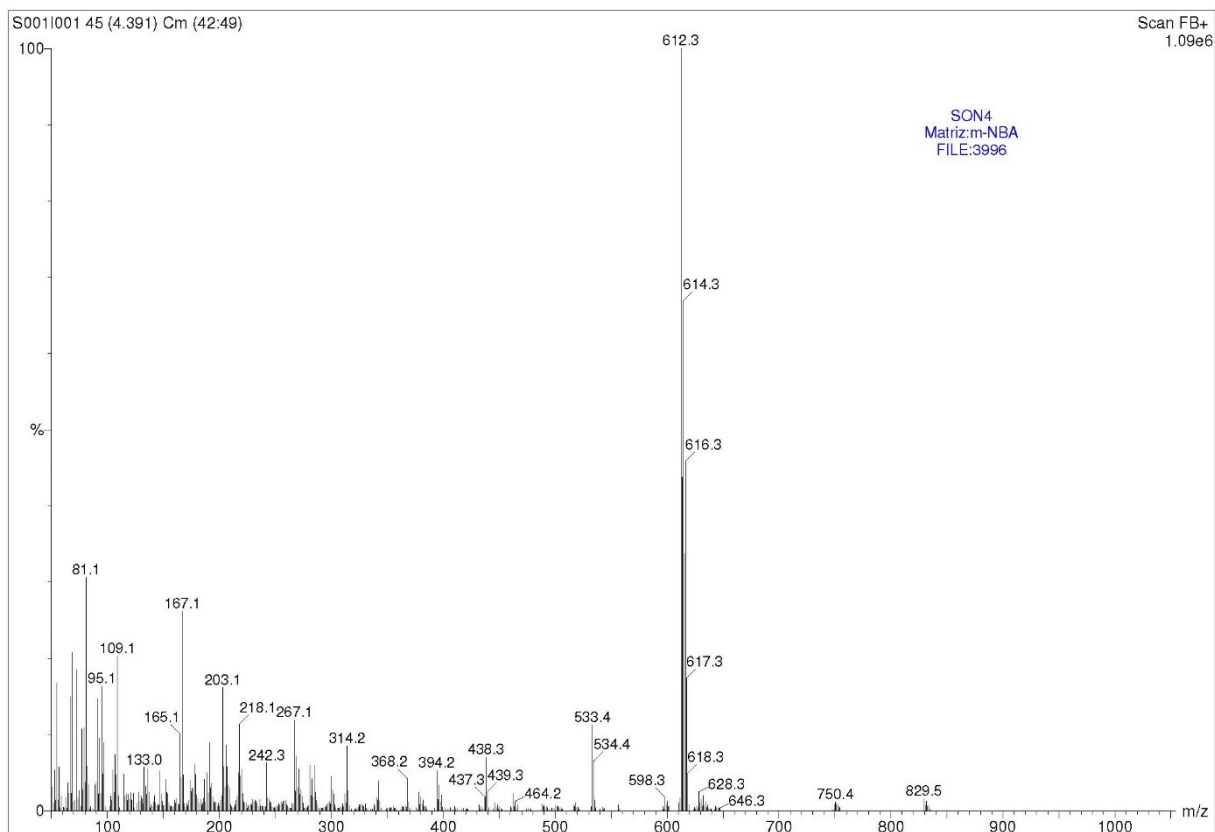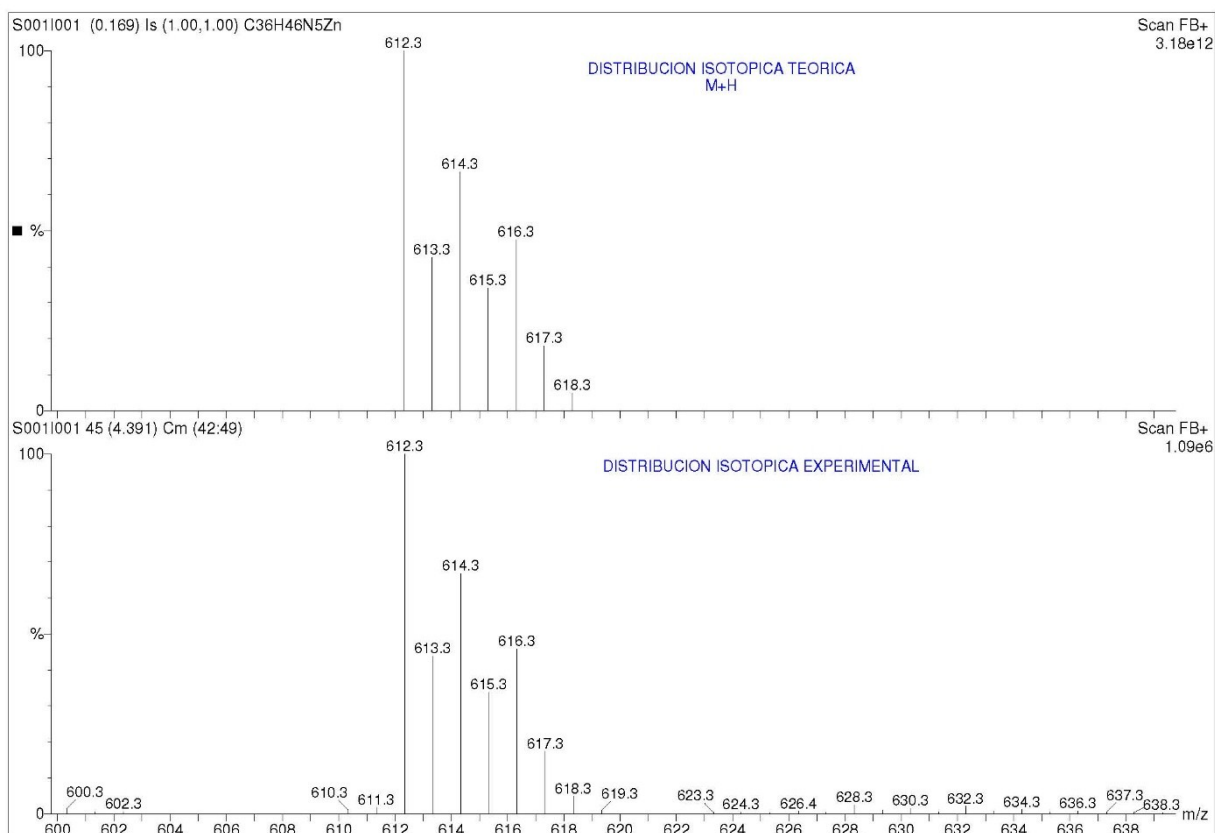

Figure S5. Mass spectra for compound 4.

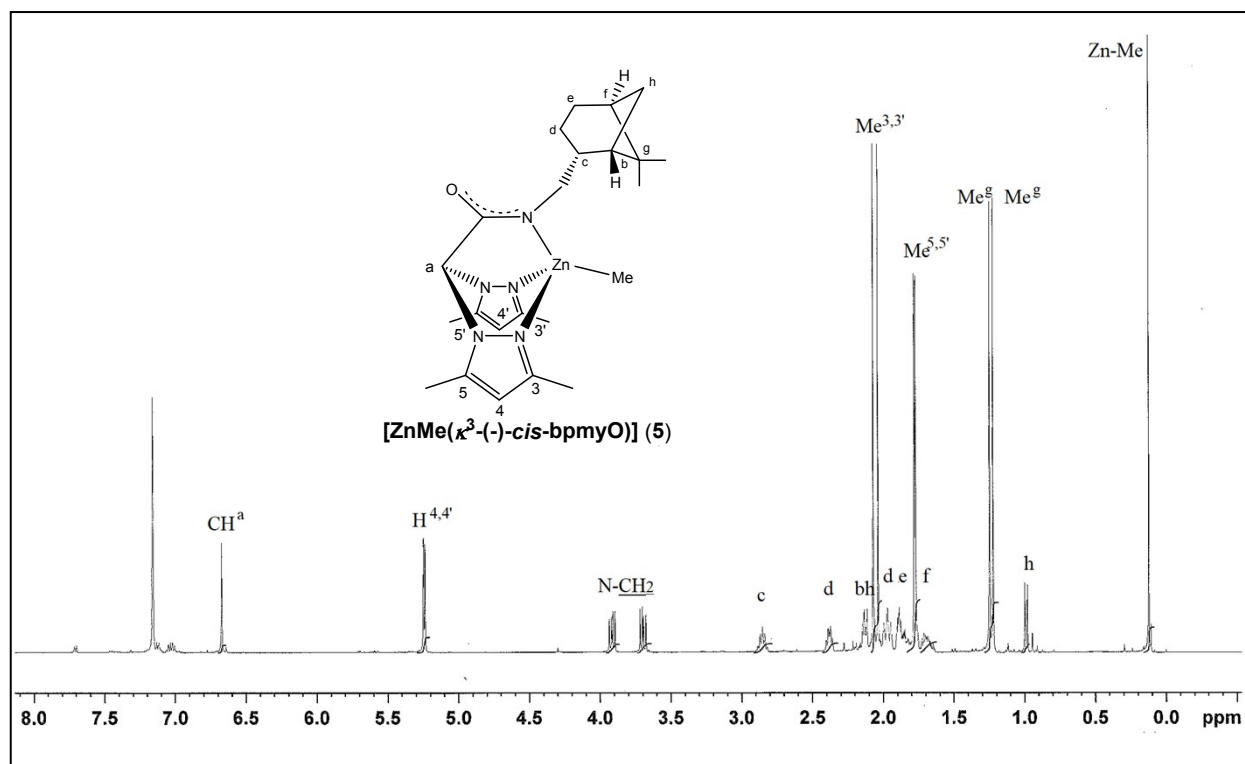

**Figure S6a.**  $^1\text{H}$  NMR (500 MHz, 298 K,  $\text{C}_6\text{D}_6$ ) spectrum of compound **5**.

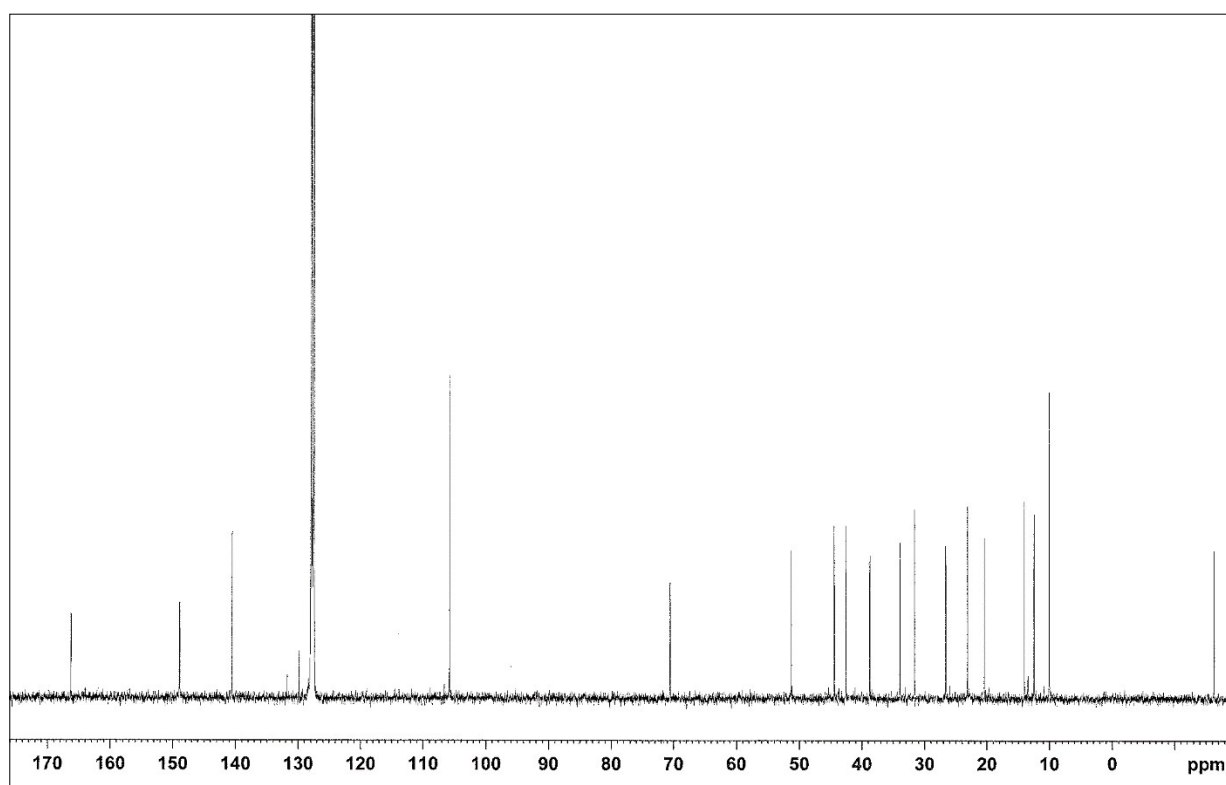

**Figure S6b.**  $^{13}\text{C}\{-^1\text{H}\}$  NMR (125 MHz, 298 K,  $\text{C}_6\text{D}_6$ ) spectrum of compound **5**.

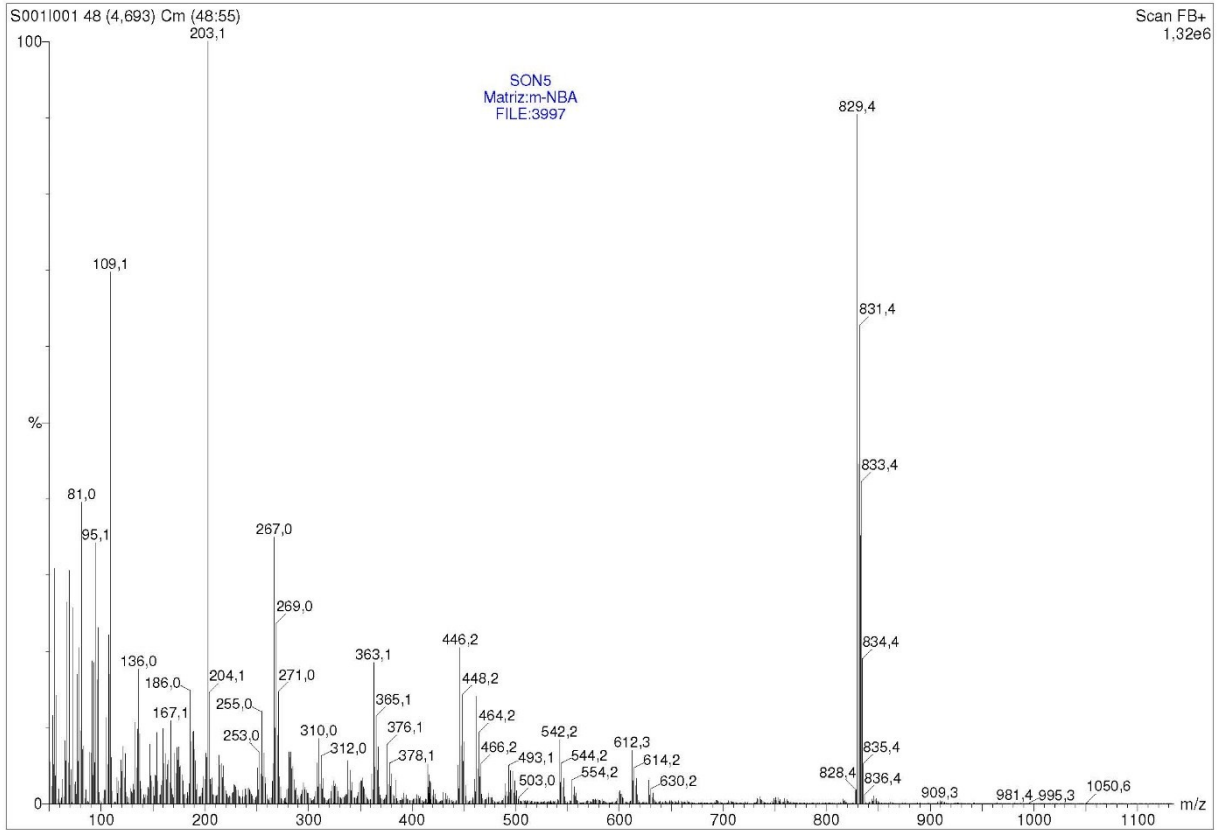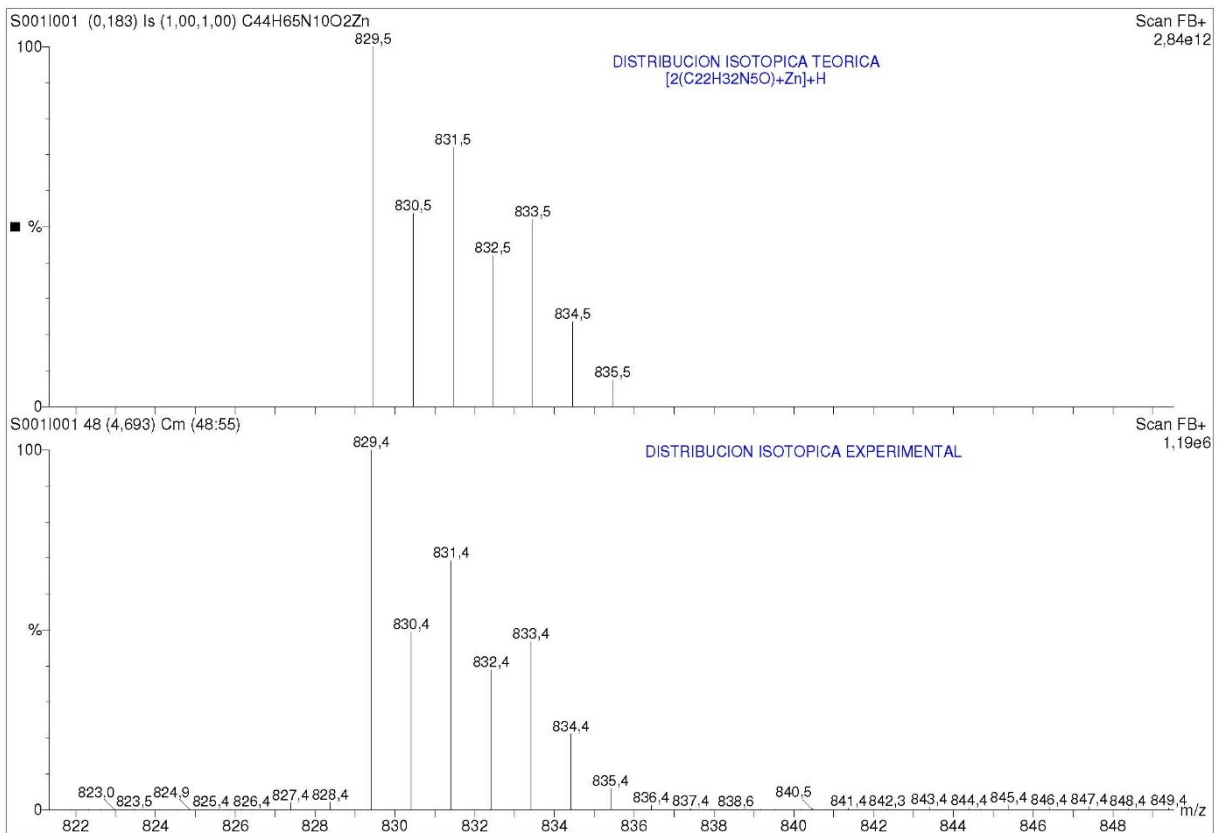

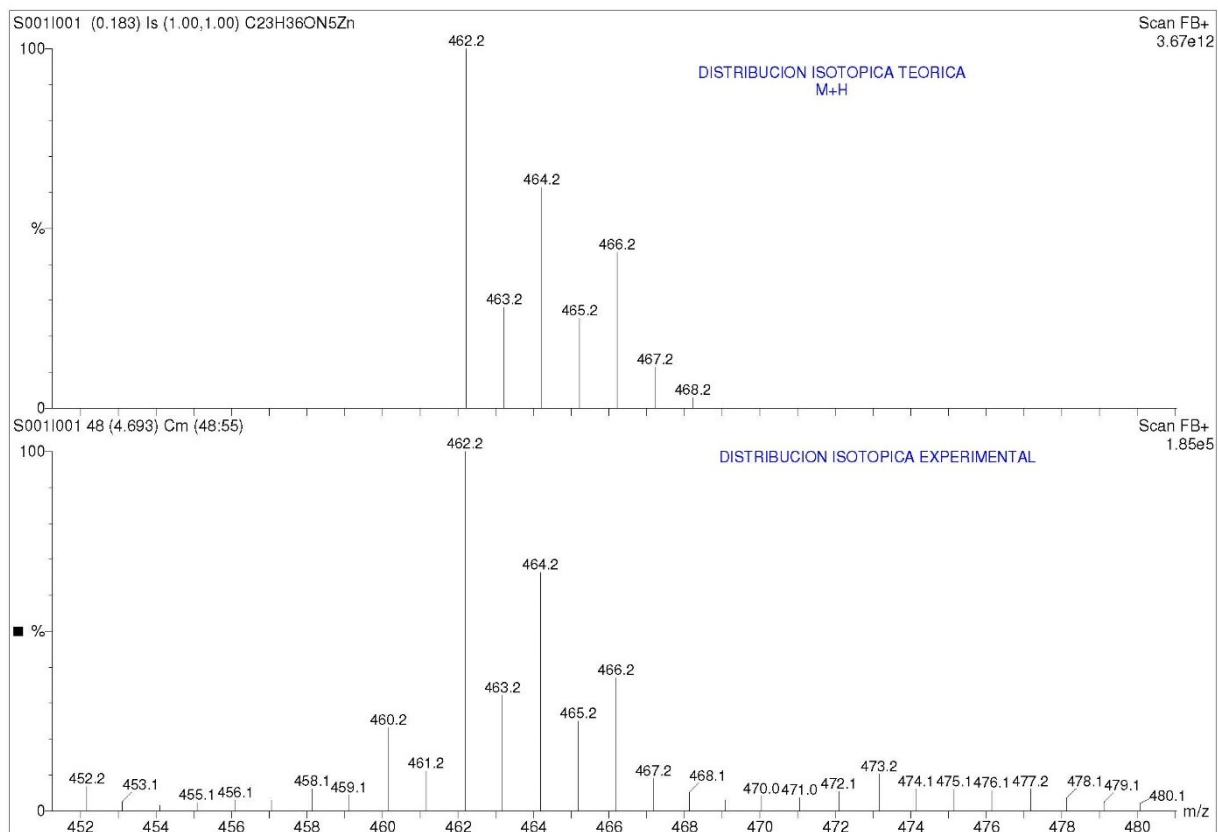

Figure S7. Mass spectra of compound 5.

**Table S1. Polymerization of *rac*-Lactide Catalyzed by 4 and 5.<sup>a</sup>**

| entry | catalyst             | time (h) | yield (g) | conv (%) <sup>b</sup> | $M_n$ (theor.) (Da) <sup>c</sup> | $M_n$ (Da) <sup>d</sup> | $M_w/M_n$ <sup>d</sup> | $P_i$ <sup>e</sup> |
|-------|----------------------|----------|-----------|-----------------------|----------------------------------|-------------------------|------------------------|--------------------|
| 1     | <b>4</b>             | 2.5      | 0.48      | 37                    | 5 300                            | 4 900                   | 1.07                   | 0.88               |
| 2     | <b>4<sup>f</sup></b> | 5        | traces    | -                     | -                                | -                       | -                      | -                  |
| 3     | <b>4<sup>g</sup></b> | 5        | traces    | -                     | -                                | -                       | -                      | -                  |
| 4     | <b>4</b>             | 6        | 0.84      | 65                    | 9 400                            | 9 700                   | 1.07                   | -                  |
| 5     | <b>4</b>             | 10       | 1.19      | 92                    | 13 200                           | 13 500                  | 1.09                   | -                  |
| 6     | <b>5</b>             | 2.5      | 0.44      | 34                    | 4 900                            | 4 700                   | 1.22                   | 0.87               |
| 7     | <b>5</b>             | 10       | 1.10      | 85                    | 12 200                           | 12 000                  | 1.18                   | -                  |
| 8     | <b>5<sup>g</sup></b> | 5        | traces    | -                     | -                                | -                       | -                      | -                  |

<sup>a</sup> Polymerization conditions: [initiator]<sub>0</sub> = 90  $\mu$ mol of catalyst, 10 mL of tetrahydrofuran as solvent, [*rac*-lactide]<sub>0</sub>/[initiator]<sub>0</sub> = 100, at 50 °C. <sup>b</sup> Percentage conversion of the monomer [(weight of polymer recovered/weight of monomer)  $\times$  100]. <sup>c</sup> Theoretical  $M_n$  = (monomer/catalyst)  $\times$  (% conversion)  $\times$  ( $M_w$  of lactide). <sup>d</sup> Determined by size exclusion chromatography relative to polystyrene standards in tetrahydrofuran. Experimental  $M_n$  was calculated considering Mark–Houwink’s corrections<sup>1</sup> for  $M_n$  [ $M_n(\text{obsd}) = 0.58 \times M_n(\text{GPC})$ ]. <sup>e</sup> The parameter  $P_i$  (i = isotactic) is the probability of forming a new *i*-dyad. The  $P_i$  and the  $P_s$  (s = syndiotactic) values were calculated from the following tetrads probabilities based on enantiomeric site control statistics<sup>2</sup> in the polymerization of *rac*-lactide:  $sis, sii, iis = [P_i^2(1-P_i) + P_i(1-P_i)^2]/2$ ;  $iii = [P_i^2(1-P_i)^2 + P_i^3 + (1-P_i)^3]/2$ ;  $isi = [P_i(1-P_i) + P_i(1-P_i)]/2$ . <sup>f</sup> 20 mL of toluene as solvent. <sup>g</sup> Experiment at 35 °C.

### ==== Shimadzu LCsolution Analysis Report ====

C:\LabSolutions\Data\gpcresultados\2017\Sonia\PLA5.lcd

Acquired by : Admin  
 Sample Name : PLA5  
 Sample ID : PLA5  
 Vial # :  
 Injection Volume : 20 uL  
 Data File Name : PLA5.lcd  
 Method File Name : metodo\_2017\_Alberto.lcm  
 Batch File Name : SingleRun120170425171458.lcb  
 Report File Name : Default.lcr  
 Data Acquired : 25/04/2017 16:15:34  
 Data Processed : 06/03/2019 19:05:28

#### <Chromatogram>

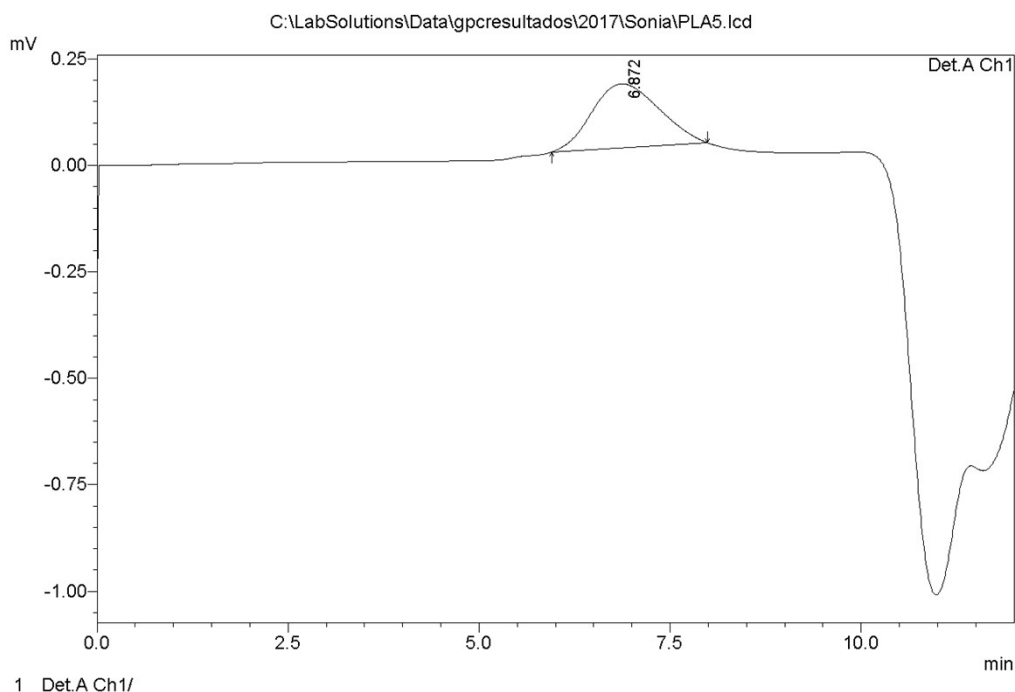

#### GPC Summary

| Chromatogram Det.A Ch1 |          |       |       |         |                     |
|------------------------|----------|-------|-------|---------|---------------------|
| #                      | Title    | Mn    | Mw    | Mw/Mn   | Intrinsic Viscosity |
| 1                      | PLA5.lcd | 8187  | 10029 | 1.22501 | 1.00000             |
|                        | Average  | 8187  | 10029 | 1.22501 | 1.00000             |
|                        | %RSD     | 0.000 | 0.000 | 0.000   | 0.000               |
|                        | Maximum  | 8187  | 10029 | 1.22501 | 1.00000             |
|                        | Minimum  | 8187  | 10029 | 1.22501 | 1.00000             |
|                        | SD       | 0     | 0     | 0.00000 | 0.00000             |

**Figure S8.** GPC trace corresponding to a poly(*rac*-lactide) (Table S1, entry 6) prepared with catalyst

5.

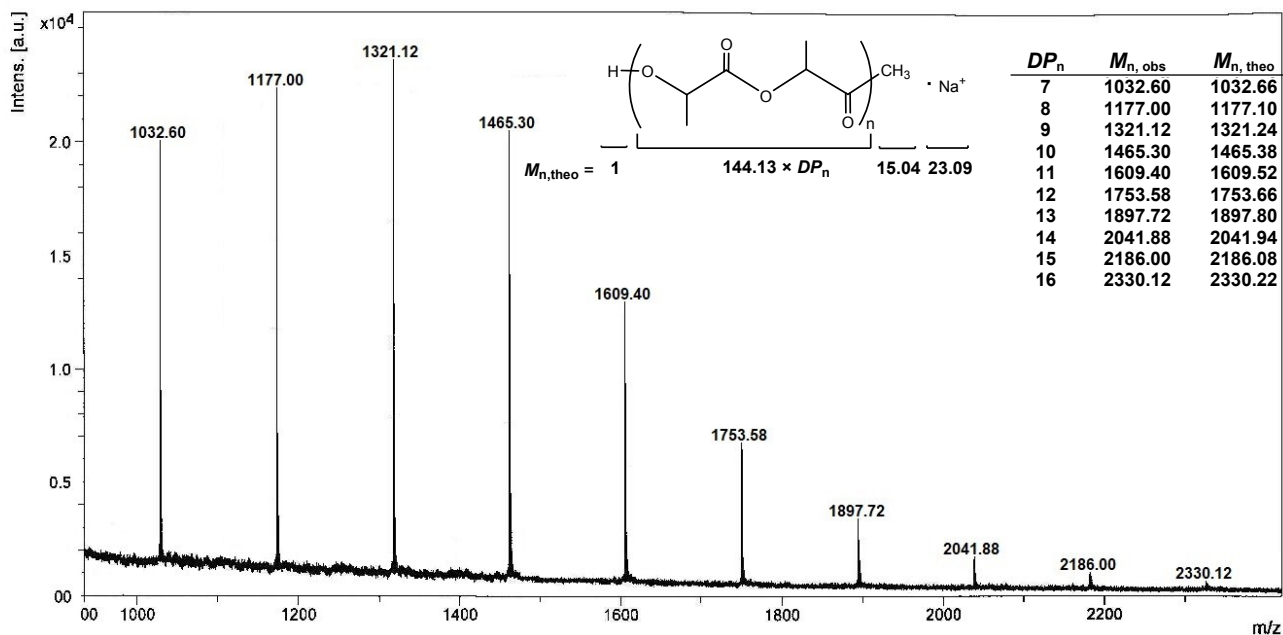

**Figure S9.** Selected area of MALDI-ToF mass spectrum of PLA sample obtained with  $[rac\text{-}LA]_0/[4]_0 = 25$ , 64% conversion; theoretical molecular weights calculated according to the equation:  $M_n = (DP_n \times M_{wLA}) + M_{wMeH} + M_{wNa}$ , where  $DP_n$  is the degree of polymerization,  $M_{wLA} = 144.13$ ,  $M_{wMeH} = 16.04$  and  $M_{wNa} = 23.09 \text{ g} \cdot \text{mol}^{-1}$ .

The distribution in the spectrum indicates the existence of a single family of polymer chains capped by  $-\text{CH}(\text{CH}_3)\text{OH}$  and  $\text{CH}_3-\text{OC}-\text{CH}(\text{CH}_3)-$  *termini*, corresponding to oligomers of formula  $\text{H}(\text{OCHMeCO})_{2n}(\text{CH}_3) \cdot \text{Na}^+$  ( $n = 7$  to  $16$ ) with consecutive peaks separated by increments of 144 Da. Moreover, neither intermolecular ester-exchange (transesterification) reactions nor cyclic oligomers were detected.

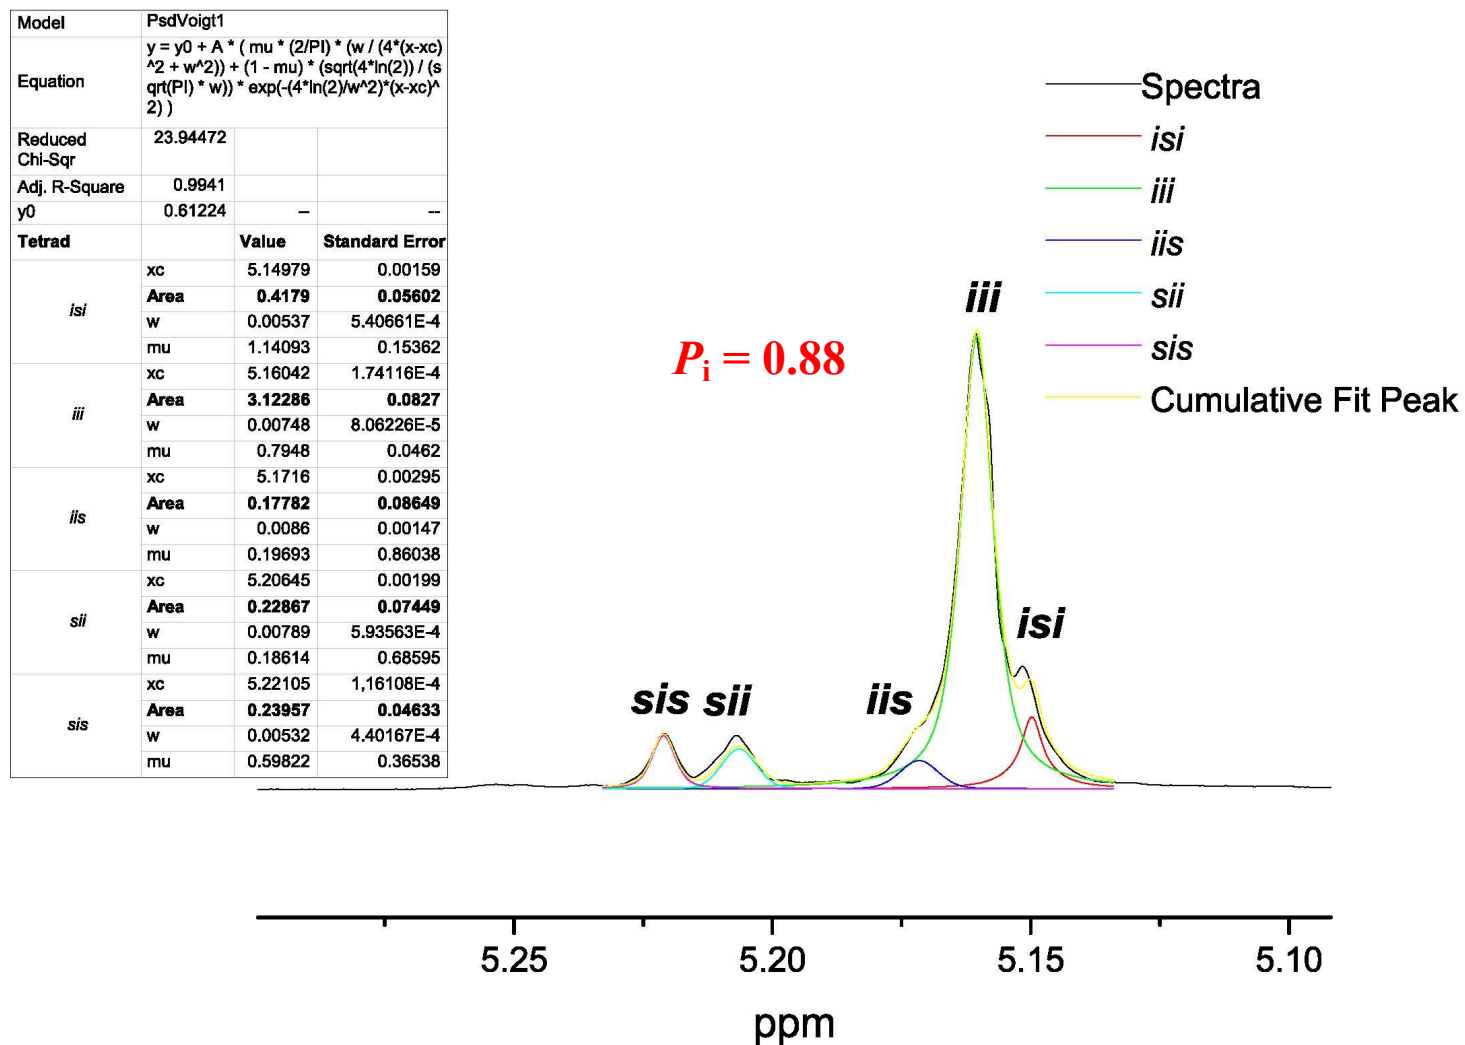

**Figure S10.** Deconvoluted  $^1\text{H}$  NMR spectra (500 MHz, 298 K,  $\text{CDCl}_3$ ) of the homodecoupled  $\text{CH}$  resonance of poly(*rac*-lactide) prepared employing  $[\text{ZnMe}(\kappa^3\text{-}(-)\text{-}cis\text{-bpm})]$  (**4**) as initiator in tetrahydrofuran at 50 °C for 2.5 h. The tacticity of the polymer was assigned using the methine signals with homonuclear decoupling as described by Hillmyer and co-workers.<sup>3</sup>



**Table S2: Tetrads Area Distribution and  $P_i$  Value Calculation.<sup>a</sup>**

|       | <i>sis</i>                            | <i>sii</i> | <i>iis</i>                           | <i>iii</i> | <i>isi</i>                  |                        |
|-------|---------------------------------------|------------|--------------------------------------|------------|-----------------------------|------------------------|
|       | <b>Experimental Normalized Values</b> |            |                                      |            |                             |                        |
|       | 0.057                                 | 0.055      | 0.042                                | 0.746      | 0.100                       |                        |
|       | <b>Theoretical Values</b>             |            |                                      |            |                             |                        |
| $P_i$ | $[P_i^2(1-P_i)+P_i(1-P_i)^2]/2$       |            | $[P_i^2(1-P_i)^2+P_i^3+(1-P_i)^3]/2$ |            | $[P_i(1-P_i)+P_i(1-P_i)]/2$ | Differences of squares |
| 0.87  | 0.05655                               | 0.05655    | 0.05655                              | 0.71725    | 0.1131                      | 0.046                  |
| 0.88  | 0.0528                                | 0.0528     | 0.0528                               | 0.736      | 0.1056                      | 0.030                  |
| 0.89  | 0.0490                                | 0.0490     | 0.0490                               | 0.7553     | 0.0979                      | 0.031                  |

<sup>a</sup> The relative theoretical tetrad proportions are based on an enantiomorphic site control statistics as proposed by Ovitt and Coates.<sup>2</sup> The best experimental  $P_i$  value is estimated by minimizing the sum of absolute differences between experimental and predicted squared values.

**Table S3. Crystal data and structure refinement for 5.**

|                                   |                                                                                                        |
|-----------------------------------|--------------------------------------------------------------------------------------------------------|
| Identification code               | 5                                                                                                      |
| Empirical formula                 | C <sub>29</sub> H <sub>49</sub> N <sub>5</sub> O Zn                                                    |
| Formula weight                    | 549.12                                                                                                 |
| Temperature                       | 110(2) K                                                                                               |
| Wavelength                        | 0.71073 Å                                                                                              |
| Crystal system                    | Monoclinic                                                                                             |
| Space group                       | P 2 <sub>1</sub>                                                                                       |
| Unit cell dimensions              | a = 7.9364(9) Å      α = 90°.<br>b = 21.825(2) Å      β = 93.640(6)°.<br>c = 17.4095(17) Å    γ = 90°. |
| Volume                            | 3009.4(5) Å <sup>3</sup>                                                                               |
| Z                                 | 4                                                                                                      |
| Density (calculated)              | 1.212 Mg/m <sup>3</sup>                                                                                |
| Absorption coefficient            | 0.845 mm <sup>-1</sup>                                                                                 |
| F(000)                            | 1184                                                                                                   |
| Crystal size                      | 0.360 x 0.200 x 0.180 mm <sup>3</sup>                                                                  |
| Theta range for data collection   | 2.344 to 26.368°.                                                                                      |
| Index ranges                      | -9 ≤ h ≤ 9, -27 ≤ k ≤ 24, -21 ≤ l ≤ 21                                                                 |
| Reflections collected             | 33635                                                                                                  |
| Independent reflections           | 11609 [R(int) = 0.0969]                                                                                |
| Completeness to theta = 25.242°   | 99.9 %                                                                                                 |
| Absorption correction             | Semi-empirical from equivalents                                                                        |
| Max. and min. transmission        | 0.745 and 0.577                                                                                        |
| Refinement method                 | Full-matrix least-squares on F <sup>2</sup>                                                            |
| Data / restraints / parameters    | 11609 / 596 / 652                                                                                      |
| Goodness-of-fit on F <sup>2</sup> | 0.862                                                                                                  |
| Final R indices [I > 2σ(I)]       | R1 = 0.0612, wR2 = 0.1387                                                                              |
| R indices (all data)              | R1 = 0.1380, wR2 = 0.1849                                                                              |
| Absolute structure parameter      | 0.031(16)                                                                                              |
| Extinction coefficient            | n/a                                                                                                    |
| Largest diff. peak and hole       | 0.389 and -0.656 e.Å <sup>-3</sup>                                                                     |

**Table S4. Atomic coordinates ( $\times 10^4$ ) and equivalent isotropic displacement parameters ( $\text{\AA}^2 \times 10^3$ ) for 5. U(eq) is defined as one third of the trace of the orthogonalized  $U^{ij}$  tensor.**

|       | x         | y       | z       | U(eq) |
|-------|-----------|---------|---------|-------|
| Zn(1) | 4802(2)   | 4053(1) | 5920(1) | 21(1) |
| N(1)  | 3188(12)  | 4454(4) | 6702(6) | 19(2) |
| N(2)  | 4026(12)  | 4762(5) | 7294(5) | 21(2) |
| N(3)  | 6289(12)  | 3768(5) | 6912(6) | 22(2) |
| N(4)  | 6611(12)  | 4217(5) | 7457(6) | 19(2) |
| N(5)  | 5994(12)  | 4852(4) | 5902(5) | 19(2) |
| O(1)  | 7390(12)  | 5579(4) | 6657(5) | 35(2) |
| C(1)  | 2935(16)  | 4950(6) | 7820(7) | 29(3) |
| C(2)  | 1370(17)  | 4772(6) | 7539(8) | 38(3) |
| C(3)  | 1533(15)  | 4460(6) | 6839(8) | 27(3) |
| C(4)  | 3537(19)  | 5266(7) | 8549(8) | 41(4) |
| C(5)  | 288(15)   | 4178(7) | 6300(8) | 39(4) |
| C(6)  | 7455(15)  | 3993(6) | 8094(7) | 23(3) |
| C(7)  | 7740(17)  | 3380(6) | 7945(8) | 29(3) |
| C(8)  | 6993(16)  | 3258(6) | 7213(8) | 24(3) |
| C(9)  | 7854(17)  | 4372(6) | 8793(7) | 33(3) |
| C(10) | 6956(17)  | 2673(6) | 6769(8) | 33(3) |
| C(11) | 5858(14)  | 4824(5) | 7314(7) | 18(2) |
| C(12) | 6486(15)  | 5122(6) | 6561(7) | 20(2) |
| C(13) | 6541(15)  | 5189(6) | 5222(6) | 25(3) |
| C(14) | 5578(12)  | 5011(5) | 4479(5) | 27(2) |
| C(15) | 6309(13)  | 5359(5) | 3800(5) | 32(2) |
| C(16) | 4983(14)  | 5586(6) | 3168(6) | 44(3) |
| C(17) | 3185(14)  | 5496(5) | 3398(7) | 41(3) |
| C(18) | 2937(13)  | 4854(6) | 3670(6) | 38(3) |
| C(19) | 3634(13)  | 5080(5) | 4466(6) | 32(2) |
| C(20) | 2963(14)  | 5724(6) | 4238(6) | 37(2) |
| C(21) | 3895(16)  | 6304(5) | 4533(7) | 42(3) |
| C(22) | 1093(14)  | 5777(7) | 4391(7) | 51(3) |
| C(23) | 4068(17)  | 3452(6) | 5129(8) | 31(3) |
| Zn(2) | 10145(2)  | 7400(1) | 9095(1) | 22(1) |
| N(6)  | 8666(11)  | 7665(5) | 8082(6) | 19(2) |
| N(7)  | 8308(12)  | 7199(4) | 7578(6) | 19(2) |
| N(8)  | 11696(12) | 6946(5) | 8357(6) | 23(2) |
| N(9)  | 10828(12) | 6617(4) | 7772(6) | 20(2) |
| N(10) | 8789(12)  | 6633(5) | 9162(6) | 22(2) |
| O(2)  | 7479(11)  | 5869(4) | 8457(5) | 29(2) |

|        |           |          |          |        |
|--------|-----------|----------|----------|--------|
| C(31)  | 7501(15)  | 7417(7)  | 6915(7)  | 25(2)  |
| C(32)  | 7287(15)  | 8022(6)  | 7013(8)  | 25(3)  |
| C(33)  | 8024(16)  | 8169(5)  | 7744(8)  | 23(3)  |
| C(34)  | 6996(16)  | 7018(6)  | 6235(7)  | 29(3)  |
| C(35)  | 8225(17)  | 8767(6)  | 8133(8)  | 32(3)  |
| C(36)  | 11903(14) | 6411(5)  | 7254(7)  | 23(3)  |
| C(37)  | 13495(15) | 6585(6)  | 7521(7)  | 29(3)  |
| C(38)  | 13295(15) | 6919(6)  | 8191(8)  | 25(3)  |
| C(39)  | 11330(17) | 6088(6)  | 6532(8)  | 34(3)  |
| C(40)  | 14625(14) | 7206(6)  | 8725(8)  | 30(3)  |
| C(41)  | 8998(14)  | 6596(6)  | 7770(7)  | 20(2)  |
| C(42)  | 8361(15)  | 6342(6)  | 8519(7)  | 19(2)  |
| C(43)  | 8263(15)  | 6380(6)  | 9883(7)  | 26(3)  |
| C(44)  | 9279(14)  | 5818(5)  | 10149(6) | 35(2)  |
| C(45)  | 8528(15)  | 5557(6)  | 10888(7) | 53(3)  |
| C(46)  | 9905(16)  | 5313(7)  | 11499(8) | 59(4)  |
| C(47)  | 11651(14) | 5461(5)  | 11292(6) | 37(2)  |
| C(48)  | 11940(20) | 5266(7)  | 10468(7) | 63(4)  |
| C(49)  | 11139(14) | 5887(5)  | 10239(6) | 36(2)  |
| C(50)  | 11877(14) | 6124(6)  | 11029(6) | 37(2)  |
| C(51)  | 13680(18) | 6313(8)  | 11015(9) | 84(5)  |
| C(52)  | 10916(18) | 6606(6)  | 11454(7) | 60(4)  |
| C(53)  | 10942(18) | 7998(6)  | 9863(8)  | 35(4)  |
| C(61)  | 3780(20)  | 3624(8)  | 9788(10) | 73(5)  |
| C(62)  | 3750(20)  | 3100(8)  | 9272(10) | 69(5)  |
| C(63)  | 3013(17)  | 3194(8)  | 8478(9)  | 55(4)  |
| C(64)  | 3000(20)  | 2636(7)  | 7969(10) | 64(4)  |
| C(65)  | 2149(18)  | 2724(8)  | 7205(9)  | 65(4)  |
| C(66)  | 2060(20)  | 2128(7)  | 6688(10) | 76(5)  |
| C(71)  | 9090(20)  | 2789(8)  | 4787(9)  | 65(5)  |
| C(76)  | 6520(20)  | 4078(8)  | 1661(9)  | 75(5)  |
| C(72)  | 8370(30)  | 2813(10) | 3971(11) | 39(6)  |
| C(73)  | 8130(40)  | 3434(12) | 3597(13) | 39(8)  |
| C(74)  | 7460(30)  | 3405(10) | 2783(12) | 38(6)  |
| C(75)  | 7030(30)  | 4036(11) | 2483(12) | 55(7)  |
| C(74A) | 7640(40)  | 3732(14) | 3009(15) | 46(8)  |
| C(72A) | 8910(50)  | 3349(14) | 4286(17) | 70(10) |
| C(75A) | 6930(50)  | 3600(15) | 2232(16) | 76(11) |
| C(73A) | 8020(60)  | 3197(18) | 3530(19) | 85(15) |

**Table S5. Bond lengths [Å] and angles [°] for 5.**

---

|             |           |
|-------------|-----------|
| Zn(1)-C(23) | 1.962(13) |
| Zn(1)-N(5)  | 1.986(10) |
| Zn(1)-N(1)  | 2.117(9)  |
| Zn(1)-N(3)  | 2.122(10) |
| N(1)-C(3)   | 1.350(14) |
| N(1)-N(2)   | 1.368(13) |
| N(2)-C(1)   | 1.363(14) |
| N(2)-C(11)  | 1.459(14) |
| N(3)-C(8)   | 1.339(16) |
| N(3)-N(4)   | 1.376(13) |
| N(4)-C(6)   | 1.350(15) |
| N(4)-C(11)  | 1.468(15) |
| N(5)-C(12)  | 1.325(15) |
| N(5)-C(13)  | 1.483(13) |
| O(1)-C(12)  | 1.235(14) |
| C(1)-C(2)   | 1.362(18) |
| C(1)-C(4)   | 1.496(18) |
| C(2)-C(3)   | 1.408(17) |
| C(3)-C(5)   | 1.455(18) |
| C(6)-C(7)   | 1.385(18) |
| C(6)-C(9)   | 1.488(17) |
| C(7)-C(8)   | 1.397(19) |
| C(8)-C(10)  | 1.492(16) |
| C(11)-C(12) | 1.572(16) |
| C(13)-C(14) | 1.512(14) |
| C(14)-C(19) | 1.548(13) |
| C(14)-C(15) | 1.549(13) |
| C(15)-C(16) | 1.555(15) |
| C(16)-C(17) | 1.520(15) |
| C(17)-C(18) | 1.496(16) |
| C(17)-C(20) | 1.565(15) |
| C(18)-C(19) | 1.540(15) |
| C(19)-C(20) | 1.547(15) |
| C(20)-C(21) | 1.538(16) |
| C(20)-C(22) | 1.528(15) |
| Zn(2)-C(53) | 1.945(13) |
| Zn(2)-N(10) | 1.998(10) |
| Zn(2)-N(8)  | 2.086(10) |
| Zn(2)-N(6)  | 2.136(10) |
| N(6)-C(33)  | 1.333(15) |

|              |           |
|--------------|-----------|
| N(6)-N(7)    | 1.361(13) |
| N(7)-C(31)   | 1.370(15) |
| N(7)-C(41)   | 1.457(15) |
| N(8)-C(38)   | 1.321(15) |
| N(8)-N(9)    | 1.391(14) |
| N(9)-C(36)   | 1.357(14) |
| N(9)-C(41)   | 1.453(14) |
| N(10)-C(42)  | 1.313(14) |
| N(10)-C(43)  | 1.457(13) |
| O(2)-C(42)   | 1.248(14) |
| C(31)-C(32)  | 1.343(18) |
| C(31)-C(34)  | 1.504(17) |
| C(32)-C(33)  | 1.403(19) |
| C(33)-C(35)  | 1.475(17) |
| C(36)-C(37)  | 1.371(16) |
| C(36)-C(39)  | 1.488(17) |
| C(37)-C(38)  | 1.393(16) |
| C(38)-C(40)  | 1.499(17) |
| C(41)-C(42)  | 1.531(16) |
| C(43)-C(44)  | 1.525(15) |
| C(44)-C(49)  | 1.482(15) |
| C(44)-C(45)  | 1.559(15) |
| C(45)-C(46)  | 1.569(16) |
| C(46)-C(47)  | 1.490(17) |
| C(47)-C(48)  | 1.527(16) |
| C(47)-C(50)  | 1.531(16) |
| C(48)-C(49)  | 1.538(16) |
| C(49)-C(50)  | 1.549(15) |
| C(50)-C(51)  | 1.491(17) |
| C(50)-C(52)  | 1.520(16) |
| C(61)-C(62)  | 1.45(2)   |
| C(62)-C(63)  | 1.48(2)   |
| C(63)-C(64)  | 1.51(2)   |
| C(64)-C(65)  | 1.47(2)   |
| C(65)-C(66)  | 1.58(2)   |
| C(71)-C(72)  | 1.50(2)   |
| C(71)-C(72A) | 1.50(2)   |
| C(76)-C(75)  | 1.47(2)   |
| C(76)-C(75A) | 1.46(2)   |
| C(72)-C(73)  | 1.51(2)   |
| C(73)-C(74)  | 1.49(2)   |
| C(74)-C(75)  | 1.50(2)   |

|                  |           |
|------------------|-----------|
| C(74A)-C(75A)    | 1.46(2)   |
| C(74A)-C(73A)    | 1.50(3)   |
| C(72A)-C(73A)    | 1.49(3)   |
| C(23)-Zn(1)-N(5) | 134.1(5)  |
| C(23)-Zn(1)-N(1) | 124.3(5)  |
| N(5)-Zn(1)-N(1)  | 87.4(4)   |
| C(23)-Zn(1)-N(3) | 120.0(5)  |
| N(5)-Zn(1)-N(3)  | 91.6(4)   |
| N(1)-Zn(1)-N(3)  | 85.7(4)   |
| C(3)-N(1)-N(2)   | 107.1(10) |
| C(3)-N(1)-Zn(1)  | 138.9(9)  |
| N(2)-N(1)-Zn(1)  | 113.8(7)  |
| C(1)-N(2)-N(1)   | 110.8(10) |
| C(1)-N(2)-C(11)  | 129.2(10) |
| N(1)-N(2)-C(11)  | 120.0(9)  |
| C(8)-N(3)-N(4)   | 105.5(9)  |
| C(8)-N(3)-Zn(1)  | 139.4(9)  |
| N(4)-N(3)-Zn(1)  | 115.0(7)  |
| C(6)-N(4)-N(3)   | 111.7(10) |
| C(6)-N(4)-C(11)  | 129.9(11) |
| N(3)-N(4)-C(11)  | 118.0(9)  |
| C(12)-N(5)-C(13) | 112.7(10) |
| C(12)-N(5)-Zn(1) | 119.4(8)  |
| C(13)-N(5)-Zn(1) | 127.8(8)  |
| N(2)-C(1)-C(2)   | 106.1(11) |
| N(2)-C(1)-C(4)   | 121.7(12) |
| C(2)-C(1)-C(4)   | 132.2(11) |
| C(1)-C(2)-C(3)   | 108.5(11) |
| N(1)-C(3)-C(2)   | 107.6(11) |
| N(1)-C(3)-C(5)   | 120.7(11) |
| C(2)-C(3)-C(5)   | 131.8(11) |
| N(4)-C(6)-C(7)   | 106.0(12) |
| N(4)-C(6)-C(9)   | 122.7(12) |
| C(7)-C(6)-C(9)   | 131.3(12) |
| C(8)-C(7)-C(6)   | 106.8(13) |
| N(3)-C(8)-C(7)   | 109.9(11) |
| N(3)-C(8)-C(10)  | 121.0(12) |
| C(7)-C(8)-C(10)  | 129.0(13) |
| N(2)-C(11)-N(4)  | 108.3(9)  |
| N(2)-C(11)-C(12) | 112.8(9)  |
| N(4)-C(11)-C(12) | 111.5(9)  |

|                   |           |
|-------------------|-----------|
| O(1)-C(12)-N(5)   | 127.9(12) |
| O(1)-C(12)-C(11)  | 115.6(11) |
| N(5)-C(12)-C(11)  | 116.5(10) |
| N(5)-C(13)-C(14)  | 113.4(9)  |
| C(13)-C(14)-C(19) | 115.9(8)  |
| C(13)-C(14)-C(15) | 109.4(8)  |
| C(19)-C(14)-C(15) | 111.3(8)  |
| C(14)-C(15)-C(16) | 115.3(9)  |
| C(17)-C(16)-C(15) | 112.1(9)  |
| C(18)-C(17)-C(16) | 110.5(10) |
| C(18)-C(17)-C(20) | 88.7(9)   |
| C(16)-C(17)-C(20) | 111.7(9)  |
| C(17)-C(18)-C(19) | 86.4(9)   |
| C(14)-C(19)-C(18) | 106.4(8)  |
| C(14)-C(19)-C(20) | 114.8(9)  |
| C(18)-C(19)-C(20) | 87.8(8)   |
| C(21)-C(20)-C(22) | 109.3(10) |
| C(21)-C(20)-C(19) | 120.9(9)  |
| C(22)-C(20)-C(19) | 110.3(10) |
| C(21)-C(20)-C(17) | 119.5(10) |
| C(22)-C(20)-C(17) | 110.8(9)  |
| C(19)-C(20)-C(17) | 83.8(8)   |
| C(53)-Zn(2)-N(10) | 132.5(5)  |
| C(53)-Zn(2)-N(8)  | 124.3(5)  |
| N(10)-Zn(2)-N(8)  | 88.7(4)   |
| C(53)-Zn(2)-N(6)  | 121.6(5)  |
| N(10)-Zn(2)-N(6)  | 90.3(4)   |
| N(8)-Zn(2)-N(6)   | 86.3(4)   |
| C(33)-N(6)-N(7)   | 105.8(9)  |
| C(33)-N(6)-Zn(2)  | 139.7(9)  |
| N(7)-N(6)-Zn(2)   | 114.3(7)  |
| C(31)-N(7)-N(6)   | 110.6(10) |
| C(31)-N(7)-C(41)  | 131.0(11) |
| N(6)-N(7)-C(41)   | 117.9(9)  |
| C(38)-N(8)-N(9)   | 104.8(10) |
| C(38)-N(8)-Zn(2)  | 140.2(9)  |
| N(9)-N(8)-Zn(2)   | 114.3(7)  |
| C(36)-N(9)-N(8)   | 110.7(9)  |
| C(36)-N(9)-C(41)  | 131.1(10) |
| N(8)-N(9)-C(41)   | 117.8(9)  |
| C(42)-N(10)-C(43) | 118.7(10) |
| C(42)-N(10)-Zn(2) | 117.8(8)  |



|                   |           |
|-------------------|-----------|
| C(43)-N(10)-Zn(2) | 123.5(8)  |
| C(32)-C(31)-N(7)  | 106.9(12) |
| C(32)-C(31)-C(34) | 129.7(13) |
| N(7)-C(31)-C(34)  | 123.3(12) |
| C(31)-C(32)-C(33) | 106.9(12) |
| N(6)-C(33)-C(32)  | 109.8(11) |
| N(6)-C(33)-C(35)  | 120.0(12) |
| C(32)-C(33)-C(35) | 130.2(12) |
| N(9)-C(36)-C(37)  | 106.7(10) |
| N(9)-C(36)-C(39)  | 123.2(11) |
| C(37)-C(36)-C(39) | 130.0(11) |
| C(36)-C(37)-C(38) | 106.1(10) |
| N(8)-C(38)-C(37)  | 111.6(11) |
| N(8)-C(38)-C(40)  | 119.6(12) |
| C(37)-C(38)-C(40) | 128.7(10) |
| N(7)-C(41)-N(9)   | 109.4(9)  |
| N(7)-C(41)-C(42)  | 112.5(9)  |
| N(9)-C(41)-C(42)  | 113.2(10) |
| O(2)-C(42)-N(10)  | 125.9(11) |
| O(2)-C(42)-C(41)  | 116.1(11) |
| N(10)-C(42)-C(41) | 118.0(10) |
| N(10)-C(43)-C(44) | 113.0(9)  |
| C(49)-C(44)-C(43) | 117.0(9)  |
| C(49)-C(44)-C(45) | 112.3(8)  |
| C(43)-C(44)-C(45) | 108.8(10) |
| C(44)-C(45)-C(46) | 113.4(10) |
| C(47)-C(46)-C(45) | 112.3(10) |
| C(46)-C(47)-C(48) | 111.2(11) |
| C(46)-C(47)-C(50) | 114.0(10) |
| C(48)-C(47)-C(50) | 87.4(9)   |
| C(47)-C(48)-C(49) | 85.1(9)   |
| C(44)-C(49)-C(50) | 116.5(9)  |
| C(44)-C(49)-C(48) | 109.1(11) |
| C(50)-C(49)-C(48) | 86.4(9)   |
| C(51)-C(50)-C(52) | 109.1(12) |
| C(51)-C(50)-C(47) | 113.4(11) |
| C(52)-C(50)-C(47) | 115.9(10) |
| C(51)-C(50)-C(49) | 112.8(11) |
| C(52)-C(50)-C(49) | 119.3(9)  |
| C(47)-C(50)-C(49) | 84.6(9)   |
| C(61)-C(62)-C(63) | 117.3(16) |
| C(62)-C(63)-C(64) | 115.2(15) |

|                      |           |
|----------------------|-----------|
| C(65)-C(64)-C(63)    | 114.3(14) |
| C(64)-C(65)-C(66)    | 114.2(13) |
| C(71)-C(72)-C(73)    | 117.9(18) |
| C(74)-C(73)-C(72)    | 114(2)    |
| C(73)-C(74)-C(75)    | 111(2)    |
| C(76)-C(75)-C(74)    | 116(2)    |
| C(75A)-C(74A)-C(73A) | 117(3)    |
| C(73A)-C(72A)-C(71)  | 111(2)    |
| C(76)-C(75A)-C(74A)  | 123(3)    |
| C(72A)-C(73A)-C(74A) | 115(3)    |

---

**Table S6. Anisotropic displacement parameters ( $\text{\AA}^2 \times 10^3$ ) for 5. The anisotropic displacement factor exponent takes the form:  $-2\pi^2 [ h^2 a^{*2} U^{11} + 2 h k a^* b^* U^{12} ]$**

|       | U <sup>11</sup> | U <sup>22</sup> | U <sup>33</sup> | U <sup>23</sup> | U <sup>13</sup> | U <sup>12</sup> |
|-------|-----------------|-----------------|-----------------|-----------------|-----------------|-----------------|
| Zn(1) | 17(1)           | 21(1)           | 25(1)           | -2(1)           | -2(1)           | -1(1)           |
| N(1)  | 15(4)           | 20(5)           | 23(4)           | -3(4)           | -1(3)           | 2(3)            |
| N(2)  | 17(4)           | 23(5)           | 22(4)           | 0(4)            | 3(3)            | -1(3)           |
| N(3)  | 22(5)           | 22(4)           | 22(4)           | -2(3)           | -1(4)           | -1(4)           |
| N(4)  | 15(5)           | 24(4)           | 20(4)           | -2(3)           | 0(3)            | -1(3)           |
| N(5)  | 16(4)           | 24(4)           | 17(4)           | 5(3)            | -1(3)           | 2(3)            |
| O(1)  | 44(5)           | 32(5)           | 27(5)           | -2(4)           | -2(4)           | -16(4)          |
| C(1)  | 32(5)           | 25(6)           | 32(5)           | -3(5)           | 17(4)           | -1(4)           |
| C(2)  | 31(5)           | 37(7)           | 47(6)           | -6(5)           | 15(5)           | -5(5)           |
| C(3)  | 16(5)           | 28(7)           | 36(6)           | 2(5)            | 3(4)            | 0(4)            |
| C(4)  | 45(8)           | 41(8)           | 39(6)           | -12(6)          | 20(5)           | 3(6)            |
| C(5)  | 19(6)           | 36(9)           | 60(8)           | -5(7)           | -8(5)           | 1(6)            |
| C(6)  | 21(6)           | 27(6)           | 21(5)           | 2(4)            | -2(4)           | 2(4)            |
| C(7)  | 32(7)           | 27(6)           | 28(6)           | 5(4)            | -4(5)           | 2(5)            |
| C(8)  | 22(6)           | 23(5)           | 28(5)           | -1(4)           | 3(5)            | 2(4)            |
| C(9)  | 34(7)           | 37(7)           | 27(6)           | -1(5)           | -8(5)           | -4(6)           |
| C(10) | 34(7)           | 24(6)           | 41(7)           | -9(5)           | -4(6)           | 9(5)            |
| C(11) | 17(4)           | 22(5)           | 14(5)           | 1(4)            | -2(4)           | -1(3)           |
| C(12) | 17(5)           | 19(5)           | 25(5)           | -3(4)           | -2(4)           | 3(4)            |
| C(13) | 25(5)           | 33(6)           | 17(4)           | 2(4)            | 2(4)            | -5(5)           |
| C(14) | 24(4)           | 31(6)           | 25(4)           | -5(4)           | 1(3)            | -1(4)           |
| C(15) | 31(5)           | 47(7)           | 19(5)           | 7(4)            | 6(4)            | 2(4)            |
| C(16) | 38(5)           | 57(8)           | 36(6)           | 7(5)            | -1(4)           | 1(5)            |
| C(17) | 38(6)           | 50(6)           | 35(5)           | -4(5)           | -3(4)           | 1(4)            |
| C(18) | 24(5)           | 47(6)           | 42(6)           | -7(5)           | 1(5)            | -3(4)           |
| C(19) | 24(5)           | 38(5)           | 34(5)           | 0(4)            | 1(4)            | -1(4)           |
| C(20) | 38(5)           | 39(5)           | 31(5)           | 0(4)            | -4(4)           | 6(4)            |
| C(21) | 53(7)           | 36(6)           | 36(7)           | 4(5)            | -6(6)           | 5(5)            |
| C(22) | 35(5)           | 73(9)           | 46(7)           | 0(6)            | -3(5)           | 18(5)           |
| C(23) | 30(7)           | 32(7)           | 33(7)           | -2(6)           | 3(6)            | -7(6)           |
| Zn(2) | 18(1)           | 22(1)           | 24(1)           | -2(1)           | -2(1)           | -2(1)           |
| N(6)  | 10(4)           | 17(4)           | 29(5)           | 0(3)            | -3(4)           | -1(3)           |
| N(7)  | 16(5)           | 15(4)           | 25(4)           | -1(3)           | -3(4)           | -2(3)           |
| N(8)  | 17(4)           | 20(5)           | 33(5)           | 0(4)            | 1(3)            | -1(3)           |
| N(9)  | 16(4)           | 16(5)           | 28(5)           | -3(4)           | 4(3)            | -1(3)           |
| N(10) | 18(4)           | 26(5)           | 23(4)           | 0(3)            | -1(3)           | 0(4)            |
| O(2)  | 37(5)           | 25(4)           | 25(4)           | 3(4)            | -7(4)           | -14(4)          |

|       |        |         |         |        |        |        |
|-------|--------|---------|---------|--------|--------|--------|
| C(31) | 20(6)  | 29(5)   | 26(5)   | 5(4)   | 1(4)   | -2(5)  |
| C(32) | 18(6)  | 28(5)   | 29(5)   | 11(4)  | 1(4)   | 0(4)   |
| C(33) | 17(6)  | 16(5)   | 37(6)   | 8(4)   | 0(5)   | 1(4)   |
| C(34) | 32(7)  | 34(7)   | 21(6)   | 6(5)   | -5(5)  | -5(6)  |
| C(35) | 33(7)  | 23(6)   | 39(7)   | 0(5)   | 4(6)   | 5(5)   |
| C(36) | 21(5)  | 18(6)   | 31(5)   | 3(4)   | 2(4)   | 6(4)   |
| C(37) | 22(5)  | 27(6)   | 40(6)   | -3(5)  | 7(4)   | 6(4)   |
| C(38) | 13(4)  | 22(6)   | 41(6)   | -2(5)  | 2(4)   | 0(4)   |
| C(39) | 33(7)  | 32(7)   | 38(6)   | -4(5)  | 7(5)   | 6(5)   |
| C(40) | 14(5)  | 31(8)   | 47(7)   | -2(6)  | 6(5)   | -2(5)  |
| C(41) | 15(4)  | 19(5)   | 25(5)   | 0(4)   | 1(4)   | 0(3)   |
| C(42) | 16(5)  | 18(5)   | 22(5)   | 2(4)   | -4(4)  | 2(4)   |
| C(43) | 23(5)  | 32(6)   | 24(5)   | 7(4)   | 0(4)   | -2(4)  |
| C(44) | 52(5)  | 20(5)   | 31(5)   | 1(4)   | -19(4) | 2(4)   |
| C(45) | 38(6)  | 60(8)   | 59(7)   | 35(6)  | -20(5) | -16(5) |
| C(46) | 53(6)  | 62(8)   | 61(7)   | 27(6)  | -13(5) | 3(5)   |
| C(47) | 45(6)  | 45(6)   | 20(5)   | 3(4)   | -12(4) | 14(4)  |
| C(48) | 92(10) | 67(8)   | 28(6)   | -5(5)  | -20(6) | 48(7)  |
| C(49) | 37(5)  | 46(6)   | 26(5)   | 3(4)   | -3(4)  | 21(4)  |
| C(50) | 35(5)  | 50(6)   | 25(5)   | 4(5)   | -7(4)  | 8(4)   |
| C(51) | 56(7)  | 112(12) | 81(10)  | 45(9)  | -19(6) | -13(7) |
| C(52) | 70(8)  | 57(8)   | 51(7)   | -18(6) | -28(6) | 12(6)  |
| C(53) | 37(8)  | 31(7)   | 37(7)   | -10(6) | -2(6)  | -5(6)  |
| C(61) | 50(9)  | 77(10)  | 93(11)  | 2(8)   | 20(8)  | -4(8)  |
| C(62) | 50(9)  | 72(9)   | 88(9)   | 15(7)  | 16(6)  | -3(7)  |
| C(63) | 18(6)  | 65(9)   | 84(8)   | 23(6)  | 24(5)  | 2(6)   |
| C(64) | 43(8)  | 55(8)   | 95(8)   | 21(6)  | 21(6)  | -1(6)  |
| C(65) | 39(7)  | 66(9)   | 93(9)   | 11(7)  | 22(6)  | 15(6)  |
| C(66) | 58(10) | 59(9)   | 113(12) | 0(8)   | 13(8)  | 0(7)   |

---

**Table S7. Hydrogen coordinates (  $\times 10^4$ ) and isotropic displacement parameters ( $\text{\AA}^2 \times 10^3$ ) for 5.**

|        | x    | y    | z    | U(eq) |
|--------|------|------|------|-------|
| H(2)   | 364  | 4844 | 7770 | 45    |
| H(4A)  | 3843 | 4966 | 8936 | 61    |
| H(4B)  | 2653 | 5521 | 8722 | 61    |
| H(4C)  | 4503 | 5514 | 8457 | 61    |
| H(5A)  | -572 | 4472 | 6151 | 59    |
| H(5B)  | -214 | 3834 | 6541 | 59    |
| H(5C)  | 829  | 4043 | 5853 | 59    |
| H(7)   | 8319 | 3102 | 8270 | 35    |
| H(9A)  | 7676 | 4796 | 8670 | 50    |
| H(9B)  | 9012 | 4309 | 8970 | 50    |
| H(9C)  | 7132 | 4253 | 9189 | 50    |
| H(10A) | 6016 | 2677 | 6394 | 50    |
| H(10B) | 6841 | 2334 | 7114 | 50    |
| H(10C) | 7987 | 2630 | 6514 | 50    |
| H(11)  | 6212 | 5090 | 7748 | 22    |
| H(13A) | 7734 | 5114 | 5172 | 30    |
| H(13B) | 6397 | 5625 | 5305 | 30    |
| H(14)  | 5806 | 4575 | 4398 | 32    |
| H(15A) | 7101 | 5091 | 3561 | 39    |
| H(15B) | 6938 | 5710 | 4004 | 39    |
| H(16A) | 5171 | 6018 | 3071 | 53    |
| H(16B) | 5133 | 5365 | 2693 | 53    |
| H(17)  | 2313 | 5641 | 3017 | 49    |
| H(18A) | 3642 | 4553 | 3436 | 45    |
| H(18B) | 1767 | 4723 | 3653 | 45    |
| H(19)  | 3110 | 4893 | 4903 | 39    |
| H(21A) | 5040 | 6293 | 4386 | 63    |
| H(21B) | 3888 | 6322 | 5083 | 63    |
| H(21C) | 3339 | 6660 | 4313 | 63    |
| H(22A) | 592  | 6104 | 4086 | 77    |
| H(22B) | 982  | 5863 | 4926 | 77    |
| H(22C) | 531  | 5399 | 4257 | 77    |
| H(23A) | 3942 | 3058 | 5364 | 47    |
| H(23B) | 4897 | 3427 | 4752 | 47    |
| H(23C) | 3006 | 3578 | 4884 | 47    |
| H(32)  | 6752 | 8292 | 6663 | 30    |

|        |       |      |       |     |
|--------|-------|------|-------|-----|
| H(34A) | 7990  | 6871 | 6007  | 44  |
| H(34B) | 6325  | 7252 | 5862  | 44  |
| H(34C) | 6350  | 6677 | 6401  | 44  |
| H(35A) | 8850  | 8714 | 8619  | 47  |
| H(35B) | 7133  | 8934 | 8216  | 47  |
| H(35C) | 8824  | 9042 | 7817  | 47  |
| H(37)  | 14503 | 6498 | 7299  | 35  |
| H(39A) | 10413 | 5819 | 6631  | 51  |
| H(39B) | 12248 | 5855 | 6349  | 51  |
| H(39C) | 10958 | 6384 | 6149  | 51  |
| H(40A) | 15361 | 7452 | 8433  | 45  |
| H(40B) | 15269 | 6891 | 8992  | 45  |
| H(40C) | 14098 | 7461 | 9090  | 45  |
| H(41)  | 8603  | 6317 | 7356  | 24  |
| H(43A) | 7078  | 6270 | 9820  | 32  |
| H(43B) | 8383  | 6693 | 10279 | 32  |
| H(44)  | 9061  | 5507 | 9749  | 42  |
| H(45A) | 7759  | 5226 | 10742 | 64  |
| H(45B) | 7882  | 5876 | 11122 | 64  |
| H(46A) | 9716  | 5492 | 11997 | 71  |
| H(46B) | 9791  | 4872 | 11545 | 71  |
| H(47)  | 12533 | 5321 | 11671 | 45  |
| H(48A) | 11279 | 4913 | 10290 | 76  |
| H(48B) | 13112 | 5225 | 10357 | 76  |
| H(49)  | 11631 | 6081 | 9797  | 44  |
| H(51A) | 14171 | 6339 | 11533 | 126 |
| H(51B) | 13745 | 6706 | 10771 | 126 |
| H(51C) | 14286 | 6017 | 10733 | 126 |
| H(52A) | 9738  | 6503 | 11430 | 91  |
| H(52B) | 11059 | 6999 | 11218 | 91  |
| H(52C) | 11342 | 6622 | 11982 | 91  |
| H(53A) | 11526 | 8322 | 9617  | 53  |
| H(53B) | 11698 | 7803 | 10240 | 53  |
| H(53C) | 9997  | 8165 | 10110 | 53  |
| H(61A) | 4527  | 3930 | 9610  | 109 |
| H(61B) | 4162  | 3496 | 10297 | 109 |
| H(61C) | 2660  | 3791 | 9799  | 109 |
| H(62A) | 3128  | 2774 | 9504  | 83  |
| H(62B) | 4902  | 2959 | 9240  | 83  |
| H(63A) | 3640  | 3516 | 8239  | 66  |
| H(63B) | 1860  | 3336 | 8505  | 66  |
| H(64A) | 4161  | 2513 | 7906  | 77  |

|        |       |      |      |     |
|--------|-------|------|------|-----|
| H(64B) | 2453  | 2303 | 8225 | 77  |
| H(65A) | 2735  | 3042 | 6938 | 78  |
| H(65B) | 1009  | 2867 | 7268 | 78  |
| H(66A) | 1634  | 2233 | 6176 | 115 |
| H(66B) | 1324  | 1834 | 6903 | 115 |
| H(66C) | 3171  | 1956 | 6670 | 115 |
| H(71A) | 9159  | 2371 | 4956 | 97  |
| H(71B) | 8380  | 3016 | 5111 | 97  |
| H(71C) | 10202 | 2966 | 4817 | 97  |
| H(71D) | 9659  | 2898 | 5272 | 97  |
| H(71E) | 9741  | 2486 | 4537 | 97  |
| H(71F) | 7996  | 2627 | 4873 | 97  |
| H(76A) | 6269  | 4497 | 1529 | 113 |
| H(76B) | 5532  | 3832 | 1549 | 113 |
| H(76C) | 7420  | 3934 | 1366 | 113 |
| H(76D) | 6063  | 3894 | 1192 | 113 |
| H(76E) | 7524  | 4302 | 1562 | 113 |
| H(76F) | 5701  | 4353 | 1854 | 113 |
| H(72A) | 7273  | 2613 | 3951 | 47  |
| H(72B) | 9089  | 2572 | 3659 | 47  |
| H(73A) | 7369  | 3675 | 3889 | 47  |
| H(73B) | 9214  | 3644 | 3620 | 47  |
| H(74A) | 6458  | 3150 | 2744 | 45  |
| H(74B) | 8295  | 3221 | 2471 | 45  |
| H(75A) | 6118  | 4197 | 2771 | 66  |
| H(75B) | 8001  | 4298 | 2588 | 66  |
| H(74C) | 6859  | 3998 | 3256 | 56  |
| H(74D) | 8677  | 3961 | 2965 | 56  |
| H(72C) | 8271  | 3659 | 4543 | 84  |
| H(72D) | 10014 | 3515 | 4203 | 84  |
| H(75C) | 7708  | 3322 | 2003 | 91  |
| H(75D) | 5897  | 3370 | 2290 | 91  |
| H(73C) | 6970  | 2993 | 3624 | 102 |
| H(73D) | 8713  | 2908 | 3265 | 102 |

---

## EXPERIMENTAL SECTION

### General Procedures

All manipulations were carried out under a nitrogen atmosphere using standard Schlenk techniques or a glovebox. Solvents were predried over sodium wire and distilled under nitrogen from sodium (toluene and *n*-hexane) or sodium-benzophenone (THF and diethyl ether). Deuterated solvents were stored over activated 4 Å molecular sieves and degassed by several freeze-thaw cycles. The starting materials ZnMe<sub>2</sub>, (-)-*cis*-myrtanylamine, diphenylacetyl chloride, Et<sub>3</sub>N, <sup>n</sup>BuLi and KO<sup>t</sup>Bu were used as purchased, and the 3,5-dimethylpyrazole<sup>4</sup> and PPh<sub>3</sub>Br<sub>2</sub><sup>5</sup> were prepared as described in the literature. *rac*-Lactide was sublimed twice, recrystallized from THF and finally sublimed again prior to use.

### Instruments and Measurements

NMR spectra were recorded on a Bruker Avance Neo 500 (<sup>1</sup>H NMR 500 MHz and <sup>13</sup>C NMR 125 MHz) spectrometer and were referenced to the residual deuterated solvent signal. Microanalyses were performed with a Perkin-Elmer 2400 CHN analyzer. Mass spectra were recorded on a VG Autospec instrument using the FAB technique and nitrobenzyl alcohol as matrix. The specific rotation [ $\alpha$ ]<sub>D</sub><sup>25</sup> was measured at a concentration of 0.1% w/v in toluene at 22 °C on a JASCO P2000 Polarimeter equipped with a sodium lamp operating at 589 nm with a light path length of 10 cm. The molecular weights ( $M_n$ ) and the molecular mass distributions ( $M_w/M_n$ ) of polymer samples were measured by Gel Permeation Chromatography (GPC) performed on a Shimadzu LC-20AD GPC equipped with a TSK-GEL G3000Hxl column and an ELSD-LTII light-scattering detector. The GPC column was eluted with THF at 40 °C at 1 mL/min and was calibrated using eight monodisperse polystyrene standards in the range 580–483 000 Da. MALDI-ToF MS data were acquired with a Bruker Autoflex II ToF/ToF spectrometer, using a nitrogen laser source (337 nm, 3 ns) in linear mode with a positive acceleration voltage of 20 kV. Samples were prepared as follows: PLA (20 mg) was dissolved in HPLC quality THF with matrix and NaI in a 100:5:5 ratio. Before evaporation, 10  $\mu$ L of the mixture solution was deposited on the sample plate. External calibration was performed by using Peptide



Calibration Standard II (covered mass range: 700–3 200 Da) and Protein Calibration Standard I (covered mass range: 5 000–17 500 Da). All values are the average of two independent measurements. The microstructures of PLA samples were determined by examination of the methine region in the homodecoupled  $^1\text{H}$  NMR spectrum of the polymers recorded at room temperature in  $\text{CDCl}_3$  on a Bruker Avance Neo 500 spectrometer with concentrations in the range 1.0 to 2.0 mg/mL.

### Preparation of compounds 1–5.

**Synthesis of phosphanimine (1).** In a 250  $\text{cm}^3$  Schlenk tube, (-)-*cis*-myrtanylamine (5  $\text{cm}^3$ , 4.58 g, 29.85 mmol) was dissolved in dry THF (30  $\text{cm}^3$ ). A solution of  $\text{PPh}_3\text{Br}_2^5$  (12.60 g, 29.85 mmol) in THF (50  $\text{cm}^3$ ) was added. To the yellow-colored mixture was added  $\text{Et}_3\text{N}$  (4.16 mL, 29.85 mmol), leaving the reaction at room temperature during 4 h. After this time, a solution of  $\text{KO}^t\text{Bu}$  (3.51 g, 31.29 mmol) in THF (30  $\text{cm}^3$ ) was added, the reaction mixture was stirred for overnight and the resulting yellow suspension was filtered. The solvent of the solution obtained was removed under reduced pressure to yield **1** as a yellow oil. Yield: 11.20 g, 91%. Anal. Calcd. for  $\text{C}_{28}\text{H}_{32}\text{NP}$ : C, 81.32; H, 7.80; N, 3.39. Found: C, 81.23; H, 7.82; N, 3.41.  $^1\text{H}$  NMR ( $\text{C}_6\text{D}_6$ , 297 K),  $\delta$  7.8–7.7 (m, 6H,  $\text{Ph}^o$ ), 7.08 (m, 6H,  $\text{Ph}^m$ ), 7.00 (m, 3H,  $\text{Ph}^p$ ), 3.40 (m, 2H,  $\text{N-CH}_2^{\text{Myr}}$ ), 2.75 (m, 1H,  $\text{H}^e$ ), 2.63 (m, 1H,  $\text{H}^b$ ), 2.50, 2.17 (m, 2H,  $\text{H}^d$ ), 1.95 (m, 2H,  $\text{H}^e$ ), 1.65 (m, 1H,  $\text{H}^f$ ), 1.21, 0.94 (s, 6H,  $\text{Me}^g$ ), 1.96, 1.11 (d, 2H,  $\text{H}^h$ ).  $^{13}\text{C}$ - $\{^1\text{H}\}$  NMR ( $\text{C}_6\text{D}_6$ , 297 K),  $\delta$  134.0 ( $\text{C}^{\text{Ph},i}$ ), 129.5 ( $\text{C}^{\text{Ph},o}$ ), 128.0 ( $\text{C}^{\text{Ph},m}$ ), 126.0 ( $\text{C}^{\text{Ph},p}$ ), 58.0 ( $\text{N-CH}_2^{\text{Myr}}$ ), 44.2 ( $\text{C}^b$ ), 42.8 ( $\text{C}^c$ ), 41.9 ( $\text{C}^e$ ), 38.7 ( $\text{C}^h$ ), 28.0, 23.9 ( $\text{Me}^g$ ), 26.1 ( $\text{C}^d$ ), 20.1 ( $\text{C}^f$ ).  $[\alpha]_{\text{D}}^{25} = -7.3$  ( $c$  1.00, EtOH).

**Synthesis of ketenimine (2).** In a 250  $\text{cm}^3$  Schlenk tube, phosphanimine (**1**) (10 g, 24.18 mmol) was dissolved in dry THF (50  $\text{cm}^3$ ). A solution of diphenylketene<sup>6</sup> (4.7 g, 24.18 mmol) in THF (30  $\text{cm}^3$ ) was added, the reaction mixture was stirred for 4 h at room temperature and a orange suspension was obtained. The solvent was removed under reduced pressure to yield an orange oil. 100  $\text{cm}^3$  of *n*-hexane was added and the new suspension was leaved to  $-26^\circ\text{C}$  overnight to favor the precipitation of triphenylphosfine oxide. The mixture of reaction was filtered and the solution dried under reduced pressure to yield **2** as a orange oil. Yield: 7.49 g, 94%. Anal. Calcd. for  $\text{C}_{24}\text{H}_{27}\text{N}$ : C, 87.49; H, 8.26; N, 4.25. Found: C, 87.63; H, 8.09; N, 4.28.  $^1\text{H}$  NMR ( $\text{C}_6\text{D}_6$ , 297 K),  $\delta$  7.42 (m, 4H,  $\text{Ph}^o$ ), 7.17 (m, 4H,  $\text{Ph}^m$ ), 4.25.

7.01 (m, 2H, Ph<sup>p</sup>), 3.40 (m, 2H, N-CH<sub>2</sub><sup>Myr</sup>), 2.39 (m, 1H, H<sup>c</sup>), 2.22, 1.80 (m, 2H, H<sup>d</sup>), 1.96 (m, 1H, H<sup>b</sup>), 1.70 (m, 2H, H<sup>e</sup>), 1.37 (m, 1H, H<sup>f</sup>), 1.05, 0.81 (s, 6H, Me<sup>g</sup>), 1.78, 0.79 (d, 2H, H<sup>h</sup>). <sup>13</sup>C-<sup>1</sup>H NMR (C<sub>6</sub>D<sub>6</sub>, 297 K), δ 185.9, 185.0 (C=C), 136.0 (C<sup>Ph,i</sup>), 129.0 (C<sup>Ph,o</sup>), 128.0 (C<sup>Ph,m</sup>), 126.0 (C<sup>Ph,p</sup>), 59.2 (N-CH<sub>2</sub><sup>Myr</sup>), 44.0 (C<sup>b</sup>), 42.3 (C<sup>c</sup>), 41.8 (C<sup>g</sup>), 38.8 (C<sup>e</sup>), 33.2 (C<sup>h</sup>), 28.0, 23.8 (Me<sup>g</sup>), 26.0 (C<sup>d</sup>), 20.0 (C<sup>f</sup>). [ $\alpha$ ]<sub>D</sub><sup>25</sup> = -22.0 (c 1.00, EtOH).

**Synthesis of (-)-cis-bpmyH (3a) and (-)-cis-bpmy'H (3b).** In a 250 cm<sup>3</sup> Schlenk tube bis(3,5-dimethylpyrazol-1-yl)methane (bdmpzm)<sup>4</sup> (1 g, 4.89 mmol) was dissolved in dry THF (50 mL) and cooled to around -70 °C (acetone/liquid nitrogen). <sup>n</sup>BuLi (2.5 M in n-hexane) (1.95 cm<sup>3</sup>, 4.89 mmol) was added dropwise, maintaining the reaction temperature at -70 °C for 1 h to give a yellow suspension. A pre-cooled solution (salt/ice at 0 °C) of ketenimine **2** (1.61 g, 4.89 mmol) in THF (20 mL) was added dropwise to the suspension. The resulting mixture was allowed to reach 0 °C and was maintained at this temperature for one hour. After this time a saturated solution of NH<sub>4</sub>Cl in water (40 mL) was added to the mixture and the organic layer is decanted into a 250 mL separatory funnel. The resulting organic phase was dried over MgSO<sub>4</sub> and solvent was removed under vacuum to give a yellow oil. The product were purified using a plug of silica, eluting with a mixture of AcOEt/*n*-hexane (1:9) to give compound **3** yellow oil as two tautomers mixture (**3a**, **3b**) (1:1). Tautomer **3a** was separated by crystallization at -26 °C in a hexane solution, while from mother liquor after several recrystallizations, tautomer **3b** was obtained as the majority product. Yield of mixture: 1.77 g, 68%. Anal. Calcd. for C<sub>35</sub>H<sub>43</sub>N<sub>5</sub>: C, 78.76; H, 8.12; N, 13.12. Found: C, 78.45; H, 8.17; N, 13.42. **(-)-cis-bpmyH (3a):** <sup>1</sup>H NMR (C<sub>6</sub>D<sub>6</sub>, 297 K), δ 7.42 (m, 4H, Ph<sup>o</sup>), 7.15 (m, 4H, Ph<sup>m</sup>), 7.01 (m, 2H, Ph<sup>p</sup>), 6.78 (s, 1H, CH<sup>a</sup>), 5.70, 5.69 (s, 1H, H<sup>4,4'</sup>), 5.36 (t, 1H, -NH-CH<sub>2</sub><sup>Myr</sup>), 3.17 (m, 2H, NH-CH<sub>2</sub><sup>Myr</sup>), 2.5-2.4 (m, 1H, H<sup>c</sup>), 2.3 (m, 1H, H<sup>b</sup>), 2.21, 1.19 (s, 6H, Me<sup>3,3'</sup>), 1.90 (m, 2H, H<sup>d</sup>), 1.80 (m, 2H, H<sup>e</sup>), 1.73, 1.70 (s, 6H, Me<sup>5,5'</sup>), 1.60 (m, 1H, H<sup>f</sup>), 1.17, 0.91 (s, 6H, Me<sup>g</sup>), 2.22, 0.90 (d, 2H, H<sup>h</sup>). <sup>13</sup>C-<sup>1</sup>H NMR (C<sub>6</sub>D<sub>6</sub>, 297 K), δ 148.5, 146.4 (C=C), 148.4 (C<sup>Ph,i</sup>), 148.1, 142.7, 139.7, 139.5 (C<sup>3,3',5,5'</sup>), 129.2 (C<sup>Ph,o</sup>), 128.5 (C<sup>Ph,m</sup>), 126.9 (C<sup>Ph,p</sup>), 126.3 (C<sup>g</sup>), 106.5, 106.0 (C<sup>4,4'</sup>), 59.4 (CH<sup>a</sup>), 54.1 (N-CH<sub>2</sub><sup>Myr</sup>), 44.5 (C<sup>f</sup>), 42.0 (C<sup>d</sup>), 41.8 (C<sup>e</sup>), 41.7 (C<sup>c</sup>), 38.2 (C<sup>h</sup>), 31.8 (C<sup>b</sup>), 27.8, 23.1 (Me<sup>g</sup>), 13.8, 11.7 (Me<sup>3,3'</sup>), 10.0, 9.9 (Me<sup>5,5'</sup>). **(-)-cis-bpmy'H (3b):** <sup>1</sup>H NMR (C<sub>6</sub>D<sub>6</sub>, 297 K), δ 7.40 (m, 4H, Ph<sup>o</sup>), 7.17 (m, 4H, Ph<sup>m</sup>), 7.03 (m, 2H, Ph<sup>p</sup>), 7.00 (s, 1H, CH<sup>a</sup>),

5.65, 5.60 (s, 2H, H<sup>4,4'</sup>), 5.38 (s, 1H, CHPh<sub>2</sub>), 3.28 (m, 2H, N-CH<sub>2</sub><sup>Myr</sup>), 2.60 (m, 1H, H<sup>c</sup>), 2.60, 2.28 (s, 6H, Me<sup>3,3'</sup>), 2.20 (m, 1H, H<sup>b</sup>), 2.21, 1.19 (s, 6H, Me<sup>5,5'</sup>), 1.80, 1.70 (m, 2H, H<sup>d</sup>), 1.65 (m, 2H, H<sup>e</sup>), 1.50 (m, 1H, H<sup>f</sup>), 1.05, 0.80 (s, 6H, Me<sup>g</sup>), 0.61, 0.29 (d, 2H, H<sup>h</sup>). <sup>13</sup>C-<sup>1</sup>H NMR (C<sub>6</sub>D<sub>6</sub>, 297 K), δ 143.4, 143.3 (C=C), 148.4 (C<sup>Ph,i</sup>), 148.0, 140.8, 133.5, 133.4 (C<sup>3,3',5,5'</sup>), 129.3 (C<sup>Ph,o</sup>), 128.6 (C<sup>Ph,m</sup>), 126.9 (C<sup>Ph,p</sup>), 125.4 (C<sup>g</sup>), 105.0, 104.5 (C<sup>4,4'</sup>), 69.1 (CH<sup>a</sup>), 54.7 (N-CH<sub>2</sub><sup>Myr</sup>), 52.5 (CHPh<sub>2</sub>), 49.1 (C<sup>c</sup>), 44.0 (C<sup>f</sup>), 41.6 (C<sup>d</sup>), 38.1 (C<sup>e</sup>), 33.7 (C<sup>b</sup>), 33.0 (C<sup>h</sup>), 27.9, 23.0 (Me<sup>g</sup>), 13.9, 11.9 (Me<sup>3,3'</sup>), 13.8, 11.7 (Me<sup>5,5'</sup>). [ $\alpha$ ]<sub>D</sub><sup>25</sup> of **3** = -5.1 (c 1.00, EtOH).

**Synthesis of [ZnMe( $\kappa^3$ -(-)-cis-bpmy)] (4).** In a 250 cm<sup>3</sup> Schlenk tube the scorpionate ligand **3** (1.0 g, 1.87 mmol) was dissolved in dry toluene. ZnMe<sub>2</sub> (0.94 mL, 1.87 mmol, 2.0 M in toluene) was added and the mixture was heated at 80 °C for 72 h. The crude reaction mixture was dried under reduced pressure, resulting a sticky orange solid. Yield: 1.07 g, 93%. Anal. Calcd. for C<sub>36</sub>H<sub>45</sub>N<sub>5</sub>Zn: C, 70.52; H, 7.40; N, 11.42; Found: C, 70.53; H, 7.27; N, 11.38. mp 134-136 °C. <sup>1</sup>H NMR (C<sub>6</sub>D<sub>6</sub>, 297 K), δ 7.30 (m, 4H, Ph<sup>o</sup>), 7.10 (m, 4H, Ph<sup>m</sup>), 7.02 (s, 1H, CH<sup>a</sup>), 7.00 (m, 2H, Ph<sup>p</sup>), 5.32, 5.29 (s, 2H, H<sup>4,4'</sup>), A 3.23, B 3.18, X 2.89 [ABX, J<sub>AB</sub> = 13.4, J<sub>AX</sub> = 7.4, J<sub>BX</sub> = 8.3 Hz (N-CH<sub>2</sub><sup>Myr</sup>, H<sup>c</sup>)] 2.30 (m, 1H, H<sup>b</sup>), 2.10 (s, 6H, Me<sup>3,3'</sup>), 1.90 (m, 2H, H<sup>d</sup>), 1.80 (m, 2H, H<sup>e</sup>), 1.70, 1.62 (s, 6H, Me<sup>5,5'</sup>), 1.25 (m, 1H, H<sup>f</sup>), 1.70, 1.11 (d, 2H, H<sup>h</sup>), 1.09, 0.89 (s, 6H, Me<sup>g</sup>), 0.11 (s, 1H, Zn-Me). <sup>13</sup>C-<sup>1</sup>H NMR (C<sub>6</sub>D<sub>6</sub>, 297 K), δ 152.0, 148.0 (C=C), 148.0, 140.0, 132.0, 131.0 (C<sup>3,3',5,5'</sup>), 139.1 (C<sup>Ph,i</sup>), 130.0 (C<sup>Ph,o</sup>), 129.0 (C<sup>Ph,m</sup>), 124.2 (C<sup>Ph,p</sup>), 105.5 (C<sup>4,4'</sup>), 66.5 (CH<sup>a</sup>), 61.0 (N-CH<sub>2</sub><sup>Myr</sup>), 44.0 (C<sup>b</sup>), 42.0 (C<sup>c</sup>), 38.5 (C<sup>e</sup>), 33.5 (C<sup>h</sup>), 28.1, 23.0 (Me<sup>g</sup>), 26.0 (C<sup>d</sup>), 20.1 (C<sup>f</sup>), 12.5 (Me<sup>3,3'</sup>), 10.2, 9.8 (Me<sup>5,5'</sup>), -16.0 (ZnMe). [ $\alpha$ ]<sub>D</sub><sup>25</sup> = -9.1 (c 1.00, EtOH). Mass spectrum (FAB): (*m/z* assignment, % intensity): 612,3 [ZnMe(bpmy) + H]<sup>+</sup>, 100.

**Synthesis of [ZnMe( $\kappa^3$ -(-)-cis-bpmyO)] (5).** In a 250 cm<sup>3</sup> Schlenk tube the complex **4** (1.5 g, 2.45 mmol) was dissolved in dry *n*-hexane (25 cm<sup>3</sup>). After 72 hours at room temperature in an air atmosphere were obtained complex **5** as pale orange crystals suitable for X-ray diffraction. Yield: 0.42 g, 37%. Anal. Calcd. for C<sub>23</sub>H<sub>35</sub>ON<sub>5</sub>Zn: C, 59.67; H, 7.62; N, 15.13. Found: C, 59.75; H, 7.48; N, 15.22. mp 177-179 °C. <sup>1</sup>H NMR (C<sub>6</sub>D<sub>6</sub>, 297 K), δ 6.67 (s, 1H, CH<sup>a</sup>), 5.24, 5.23 (s, 2H, H<sup>4,4'</sup>), A 3.89, B 3.67, X 2.83 [ABX, J<sub>AB</sub> = 12.2, J<sub>AX</sub> = 7.8, J<sub>BX</sub> = 8.2 Hz (N-CH<sub>2</sub><sup>Myr</sup>, H<sup>c</sup>)], 2.39, 2.00 (m, 2H, H<sup>d</sup>), 2.24 (m, 1H, H<sup>b</sup>), 2.08, 2.04

(s, 6H, Me<sup>3,3'</sup>), 1.80 (m, 2H, H<sup>e</sup>), 1.78, 1.77 (s, 6H, Me<sup>5,5'</sup>), 1.70 (m, 1H, H<sup>f</sup>), 1.25, 1.22 (s, 6H, Me<sup>g</sup>), 2.10, 1.00 (d, 2H, H<sup>h</sup>), 0.12 (s, 1H, Zn-Me). <sup>13</sup>C-<sup>1</sup>H} NMR (C<sub>6</sub>D<sub>6</sub>, 297 K),  $\delta$  166.0 (C=O), 149.0, 141.0, 132.0, 130.0 (C<sup>3,3',5,5'</sup>), 71.0 (CH<sup>a</sup>), 51.0 (N-CH<sub>2</sub>), 44.5 (C<sup>b</sup>), 43.0 (C<sup>c</sup>), 39.0 (C<sup>e</sup>), 34.0 (C<sup>h</sup>), 31.0, 24.0 (Me<sup>g</sup>), 27.0 (C<sup>d</sup>), 20.5 (C<sup>f</sup>), 14.0, 12.5 (Me<sup>3,3'</sup>), 10.0, 9.9 (Me<sup>5,5'</sup>), -16.0 (ZnMe).  $[\alpha]_D^{25} = -3.3$  (*c* 1.00, EtOH). Mass spectrum (FAB): (*m/z* assignment, % intensity): 829,4 [Zn(bpmyO)<sub>2</sub> + H]<sup>+</sup>, 100; 462,2 [ZnMe(bpmyO) + H]<sup>+</sup>, 23.

### Typical Polymerization Procedures.

Polymerizations of *rac*-lactide (LA) were performed on a Schlenk line in a flame-dried Schlenk tube equipped with a magnetic stirrer. The Schlenk tubes were charged in a glovebox with the required amount of LA and initiator, separately, and then attached to the vacuum line. The initiator and LA were dissolved in the appropriate amount of solvent and temperature equilibration was ensured in both Schlenk tubes by stirring the solutions for 15 min in a bath. Next, the appropriate amount of initiator was added by using a syringe and polymerization times were measured from that point. Polymerizations were stopped by injecting a solution of acetic acid in water (0.35 M). Polymers were precipitated in methanol, filtered off, redissolved and reprecipitated in methanol, and dried in vacuo to a constant weight.

### X-ray Crystallographic Structure Determination for Complex 5.

The single crystal for **5** was mounted on a glass fiber and transferred to a Bruker X8 APEX II CCD-based diffractometer equipped with a graphite monochromated MoK $\alpha$  radiation source ( $\lambda = 0.71073$  Å). The highly redundant datasets were integrated using SAINT<sup>7</sup> and corrected for Lorentz and polarization effects. The absorption correction was based on fitting a function to the empirical transmission surface as sampled by multiple equivalent measurements with the program SADABS.<sup>8</sup>

The software package WINGX<sup>9</sup> was used for structure solution and refinement by full-matrix least-squares methods based on  $F^2$ . A successful solution by the direct methods provided most non-hydrogen atoms from the E-map. The remaining non-hydrogen atoms were located in an alternating

series of least-squares cycles and difference Fourier maps. The compound crystallise with one molecule of hexane in the asymmetric unit disordered over two positions. DFIX restrain and isotropic refinement were necessary for this molecule. The remaining non-hydrogen atoms were refined with anisotropic displacement coefficients. Hydrogen atoms were placed using a “riding model” and included in the refinement at calculated positions.

## References

- [1] (a) J. Baran, A. Duda, A. Kowalski, R. Szymanski and S. Penczek, *Macromol. Rapid Commun.* 1997, **18**, 325–333; (b) I. Barakat, P. Dubois, R. Jérôme and P. Teyssié, *J. Polym. Sci., Part A: Polym. Chem.* 1993, **31**, 505–514.
- [2] T. M. Ovitt and G. W. Coates, *J. Am. Chem. Soc.* 2002, **124**, 1316–1326.
- [3] M. T. Zell, B. E. Padden, A. J. Paterick, K. A. M. Thakur, R. T. Kean, M. A. Hillmyer and E. J. Munson, *Macromolecules* 2002, **35**, 7700–7707.
- [4] (a) J. Sebastian, P. Sala, J. Del Mazo, M. Sancho, C. Ochoa, J. Elguero, J. P. Fayet and M. C. Vertut, *J. Heterocyclic Chem.* 1982, **19**, 1141–1145. (b) E. Díez-Barra, A. de la Hoz, A. Sánchez-Migallon and J. Tejada, *J. Chem. Soc., Perkin Trans.* 1993, **1**, 1079–1083.
- [5] K. W. Lee and L. A. Singer, *J. Org. Chem.* 1974, **39**, 3780–3781.
- [6] E. C. Taylor, A. Mckillop and G. H. Hawks, *Org. Syn.*, 1973, **52**, 36–37.
- [7] SAINT v8.37, Bruker-AXS (2016), APEX3 v2016.1.0. Madison, Wisconsin, USA.
- [8] SADABS, L. Krause, R. Herbst-Irmer, G. M. Sheldrick and D. Stalke, Comparison of Silver and Molybdenum Microfocus X-Ray Sources for Single-Crystal Structure Determination. *J. Appl. Crystallogr.* 2015, **48**, 3–10.
- [9] (a) L. J. Farrugia, WinGX and ORTEP for Windows: an update. *J. Appl. Cryst.* 2012, **45**, 849–854; (b). G. M. Sheldrick, SHELX-2014, Program for Crystal Structure Refinement, University of Göttingen, Göttingen, Germany, 2014.
